# Supplementary material for: A global atlas of artificial light at night under the sea
Source: Oxford University Press journal article supplement (doi:10.1525/elementa.2021.00049), 2021-12-13
Supplement: supplemental.docx [file supplemental.docx]

# Supplemental material

A global atlas of artificial light at night under the sea

T. J. Smyth1*, A. E. Wright1, D. McKee2,3, S. Tidau4†,5, R. Tamir6,7, Z. Dubinsky6, D. Iluz6,8, T. W. Davies4†,5

1. Plymouth Marine Laboratory, Prospect Place, Plymouth, Devon, UK, PL1 3DH
2. Physics Department, University of Strathclyde, 107 Rottenrow, Glasgow, Scotland, G4 0NG
3. Department Arctic and Marine Biology, Faculty for Bioscience, Fisheries and Economy, UiT The Arctic University of Norway, Tromsø, Norway
4. School of Biological and Marine Sciences, University of Plymouth, Drake Circus, Plymouth, UK, PL4 8AA
5. School of Ocean Sciences, University of Bangor, Menai Bridge, Anglesey, UK, LL59 5AB
6. The Mina & Everard Goodman Faculty of Life Sciences, Bar-Ilan University, Ramat-Gan 5290002, Israel
7. The Interuniversity Institute for Marine Sciences of Eilat, Eilat, Israel
8. Department of Environmental Sciences and Agriculture, Beit Berl Academic College, Israel

** Corresponding author: tjsm@pml.ac.uk*

*† Present address*


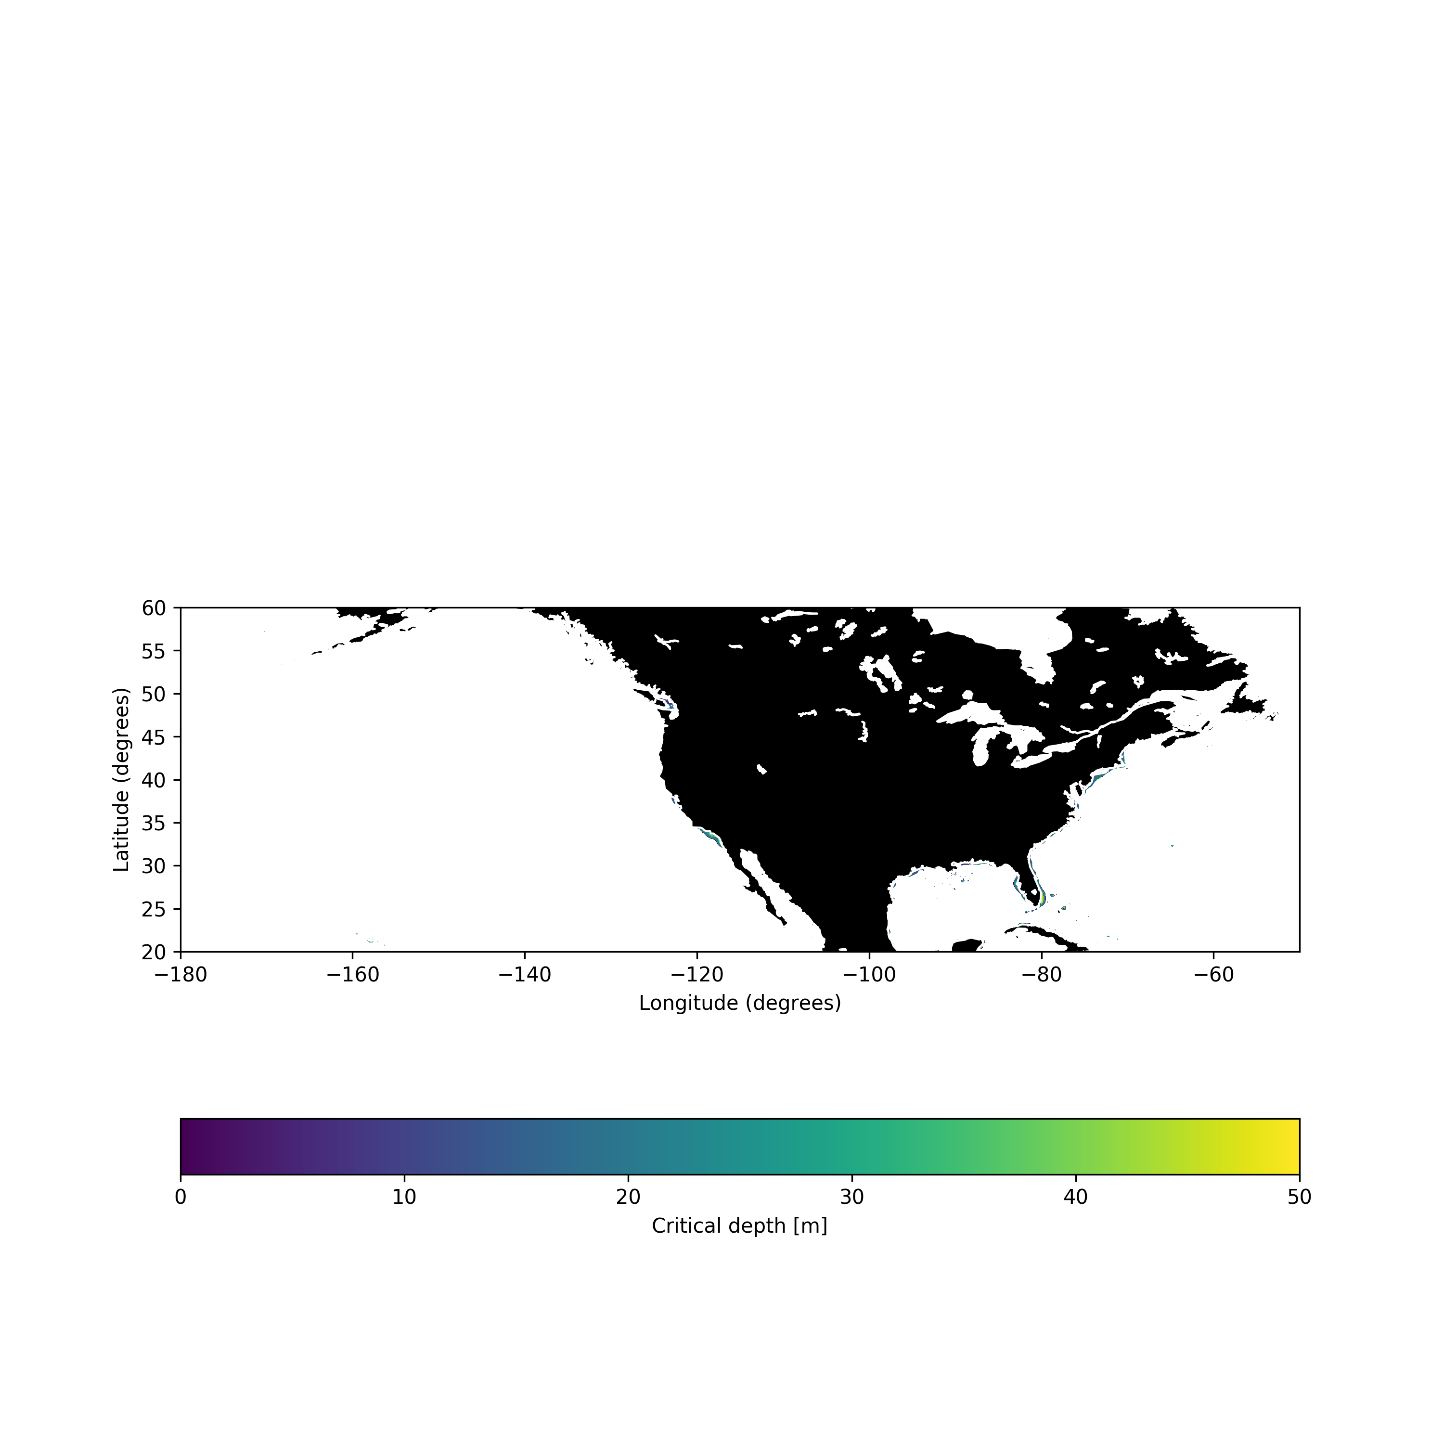


**Figure S1. Critical depth (Zc) for climatological May for North America**. Entire dataset can be downloaded in netCDF format from Pangaea (https://doi.pangaea.de/10.1594/PANGAEA.929749)


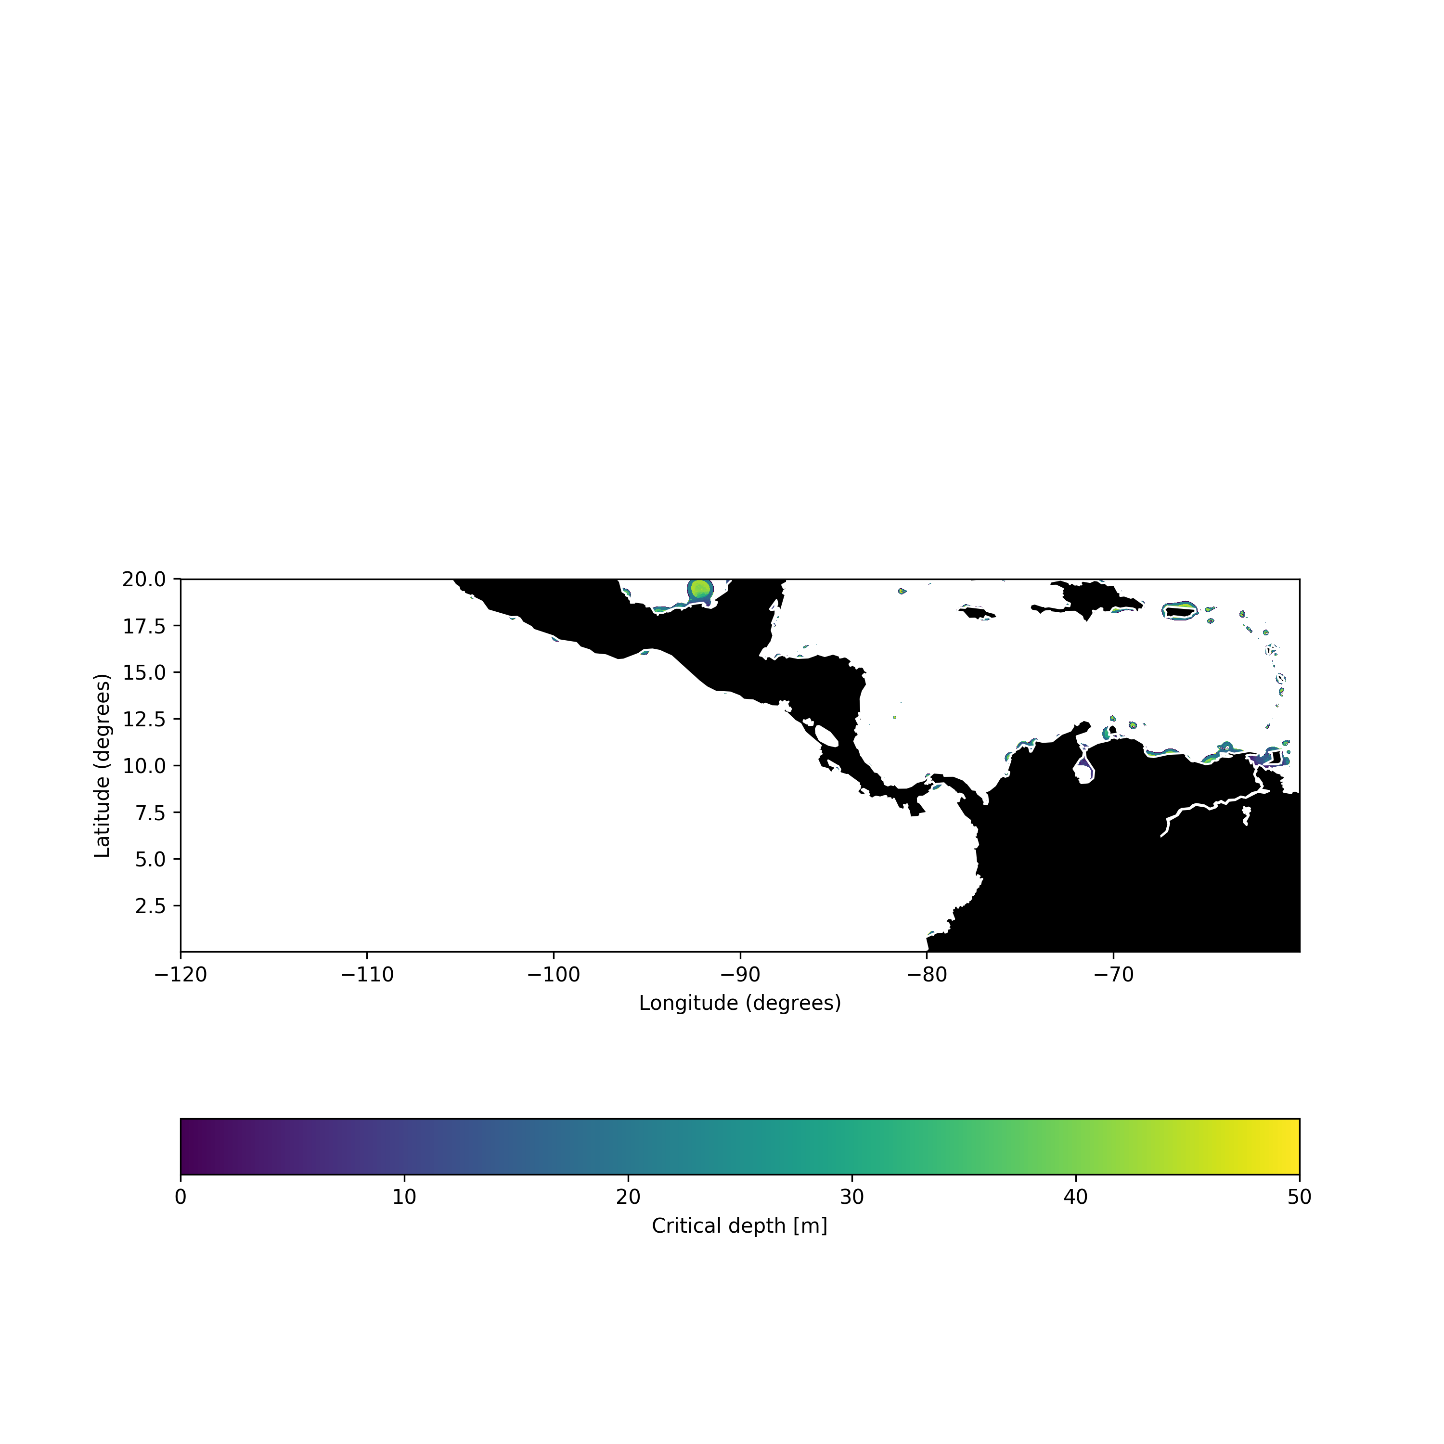


**Figure S2. Critical depth (Zc) for climatological May for Central America.** Entire dataset can be downloaded in netCDF format from Pangaea (https://doi.pangaea.de/10.1594/PANGAEA.929749)


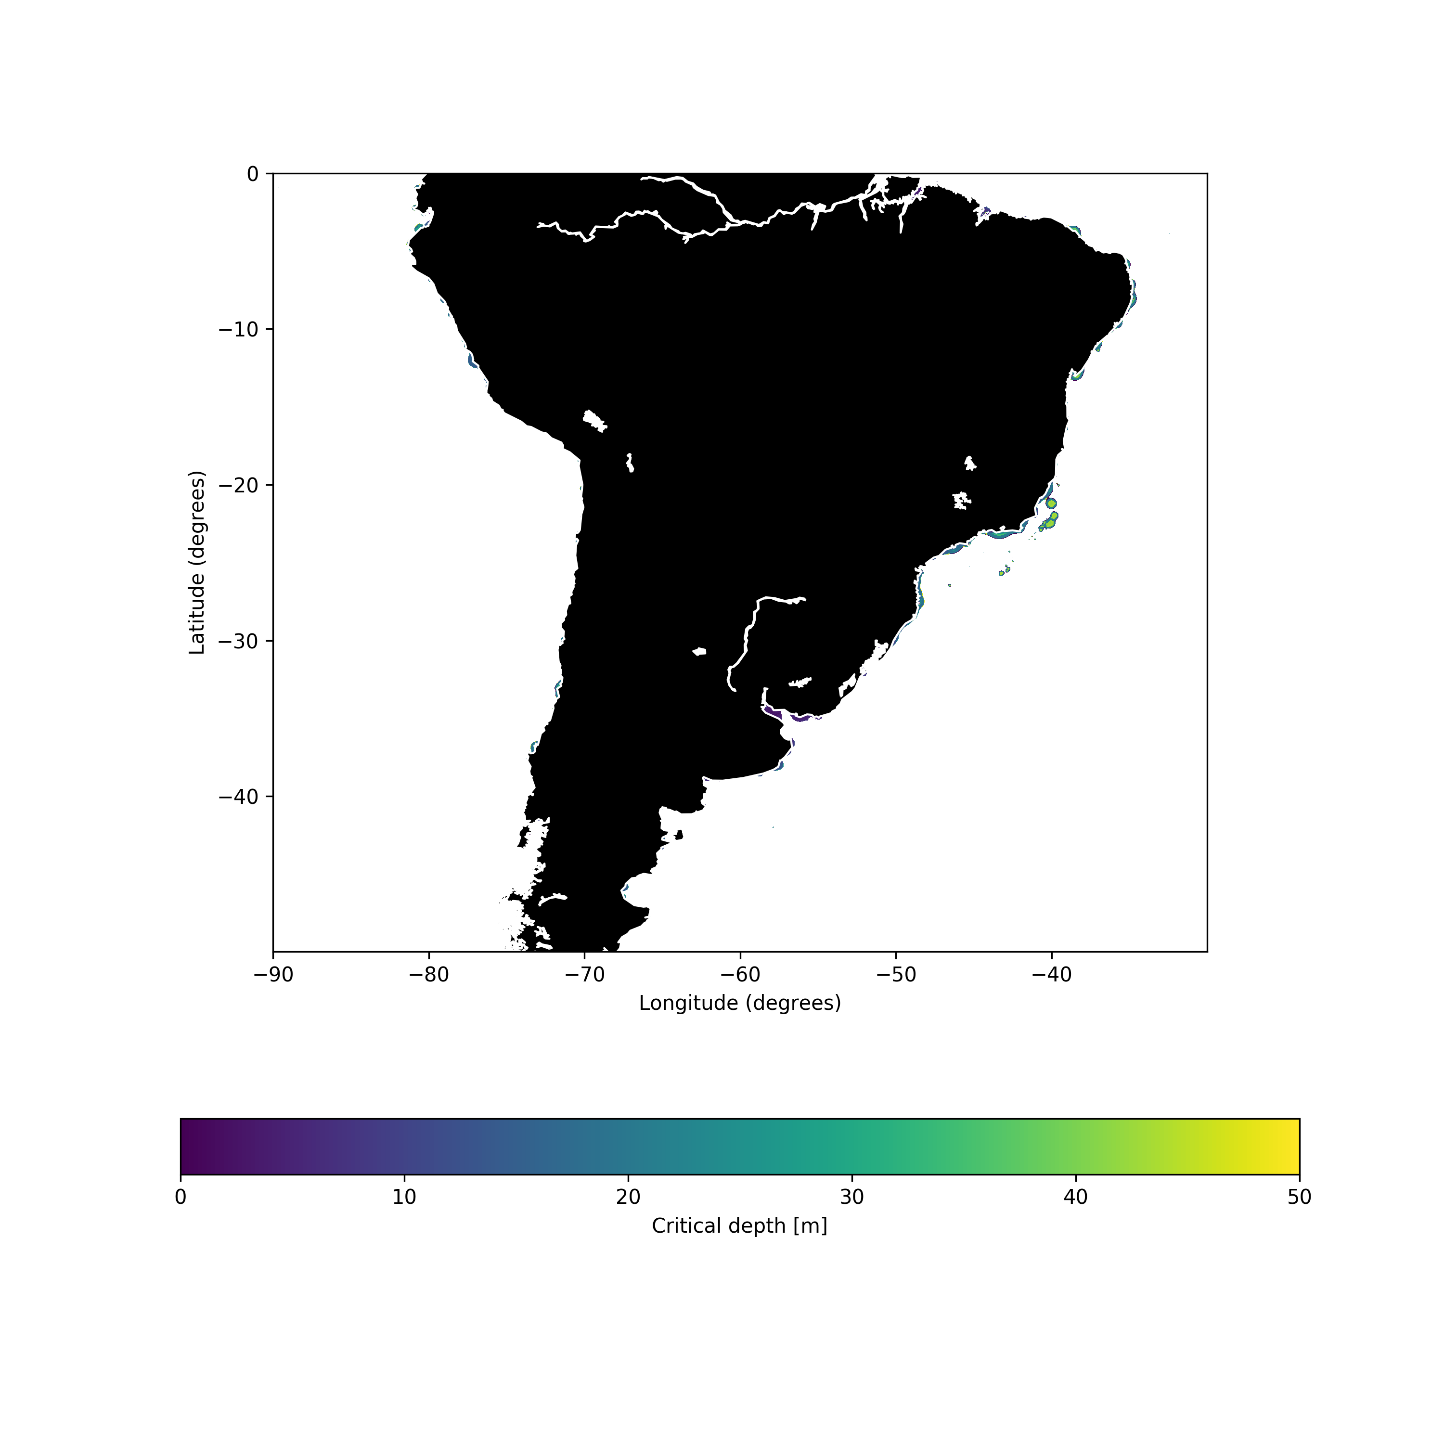


**Figure S3. Critical depth (Zc) for climatological May for South America**. Entire dataset can be downloaded in netCDF format from Pangaea (https://doi.pangaea.de/10.1594/PANGAEA.929749).


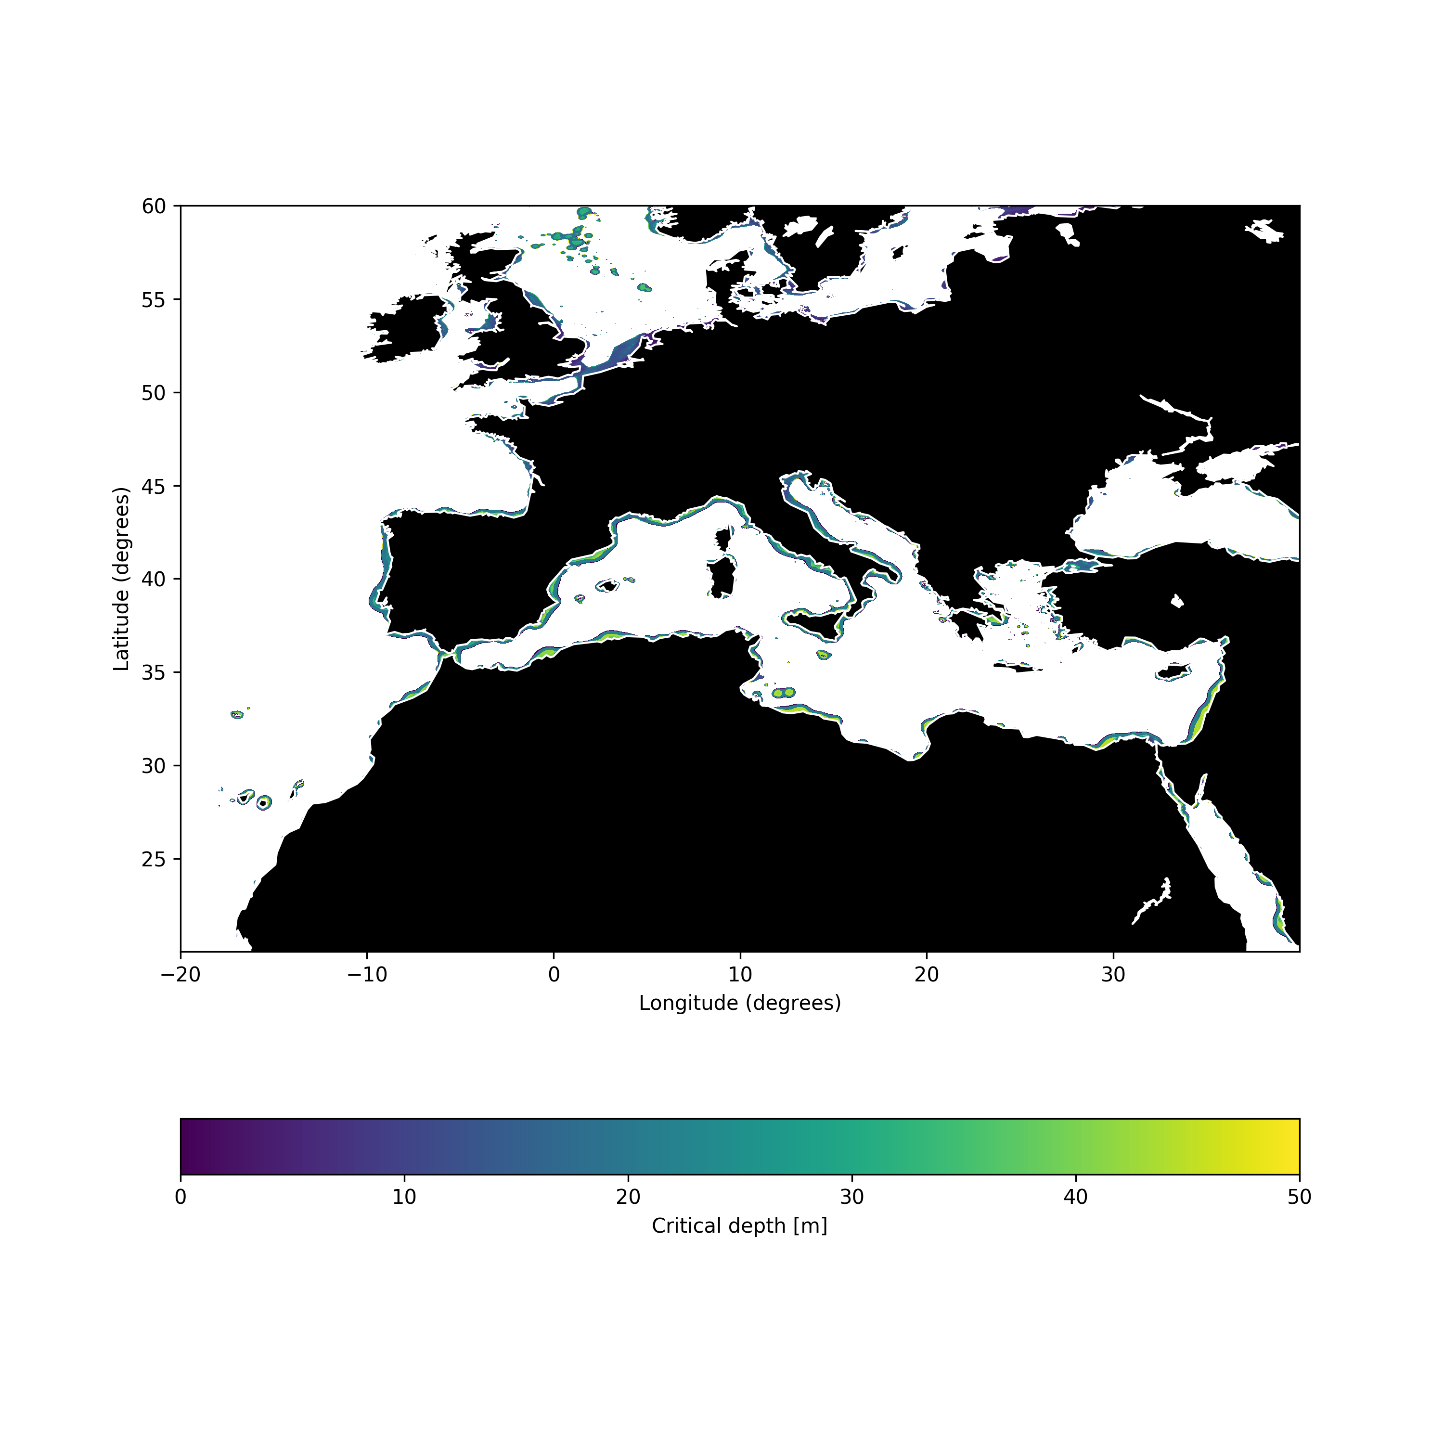


**Figure S4. Critical depth (Zc) for climatological May for Europe, Northern Africa and Mediterranean.** Entire dataset can be downloaded in netCDF format from Pangaea (https://doi.pangaea.de/10.1594/PANGAEA.929749).


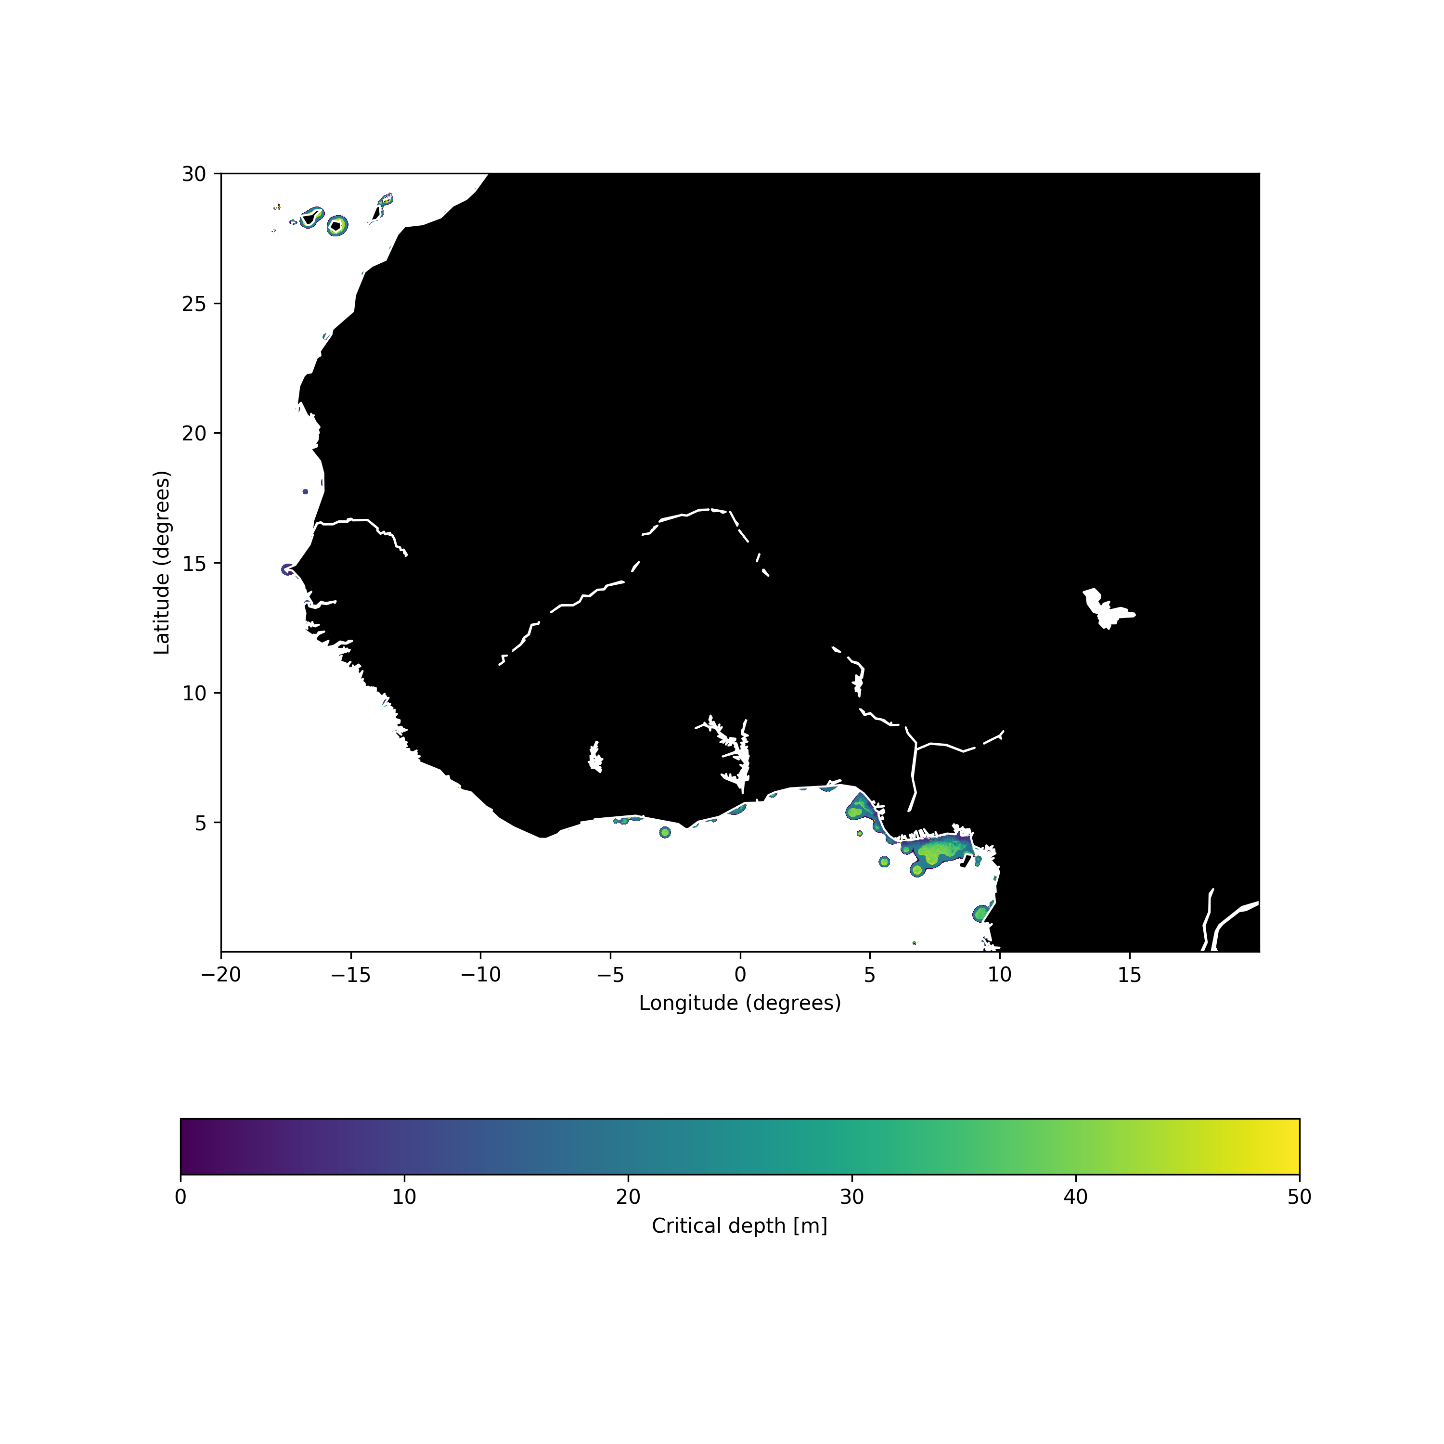


**Figure S5. Critical depth (Zc) for climatological May for northwest Africa.** Entire dataset can be downloaded in netCDF format from Pangaea (https://doi.pangaea.de/10.1594/PANGAEA.929749).


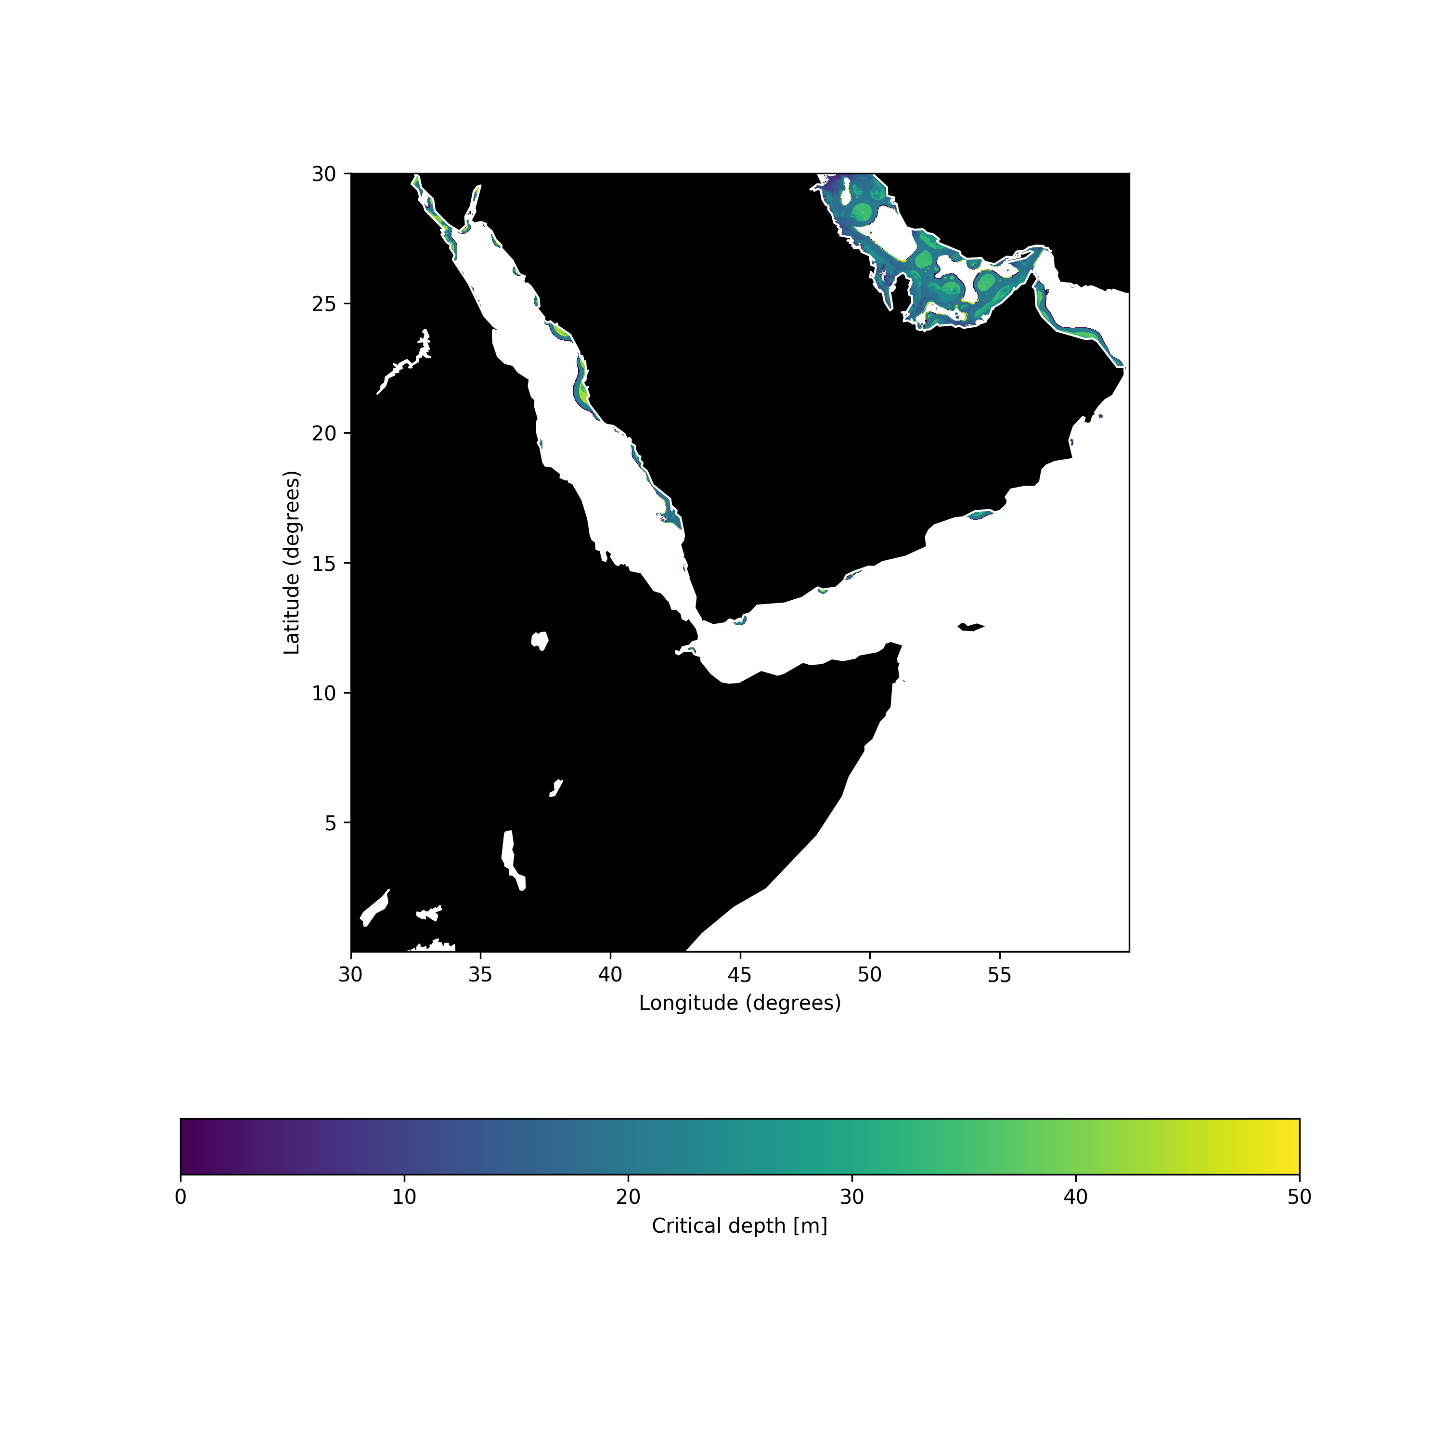


**Figure S6. Critical depth (Zc) for climatological May for northeast Africa and Arabian Peninsula.** Entire dataset can be downloaded in netCDF format from Pangaea (https://doi.pangaea.de/10.1594/PANGAEA.929749)


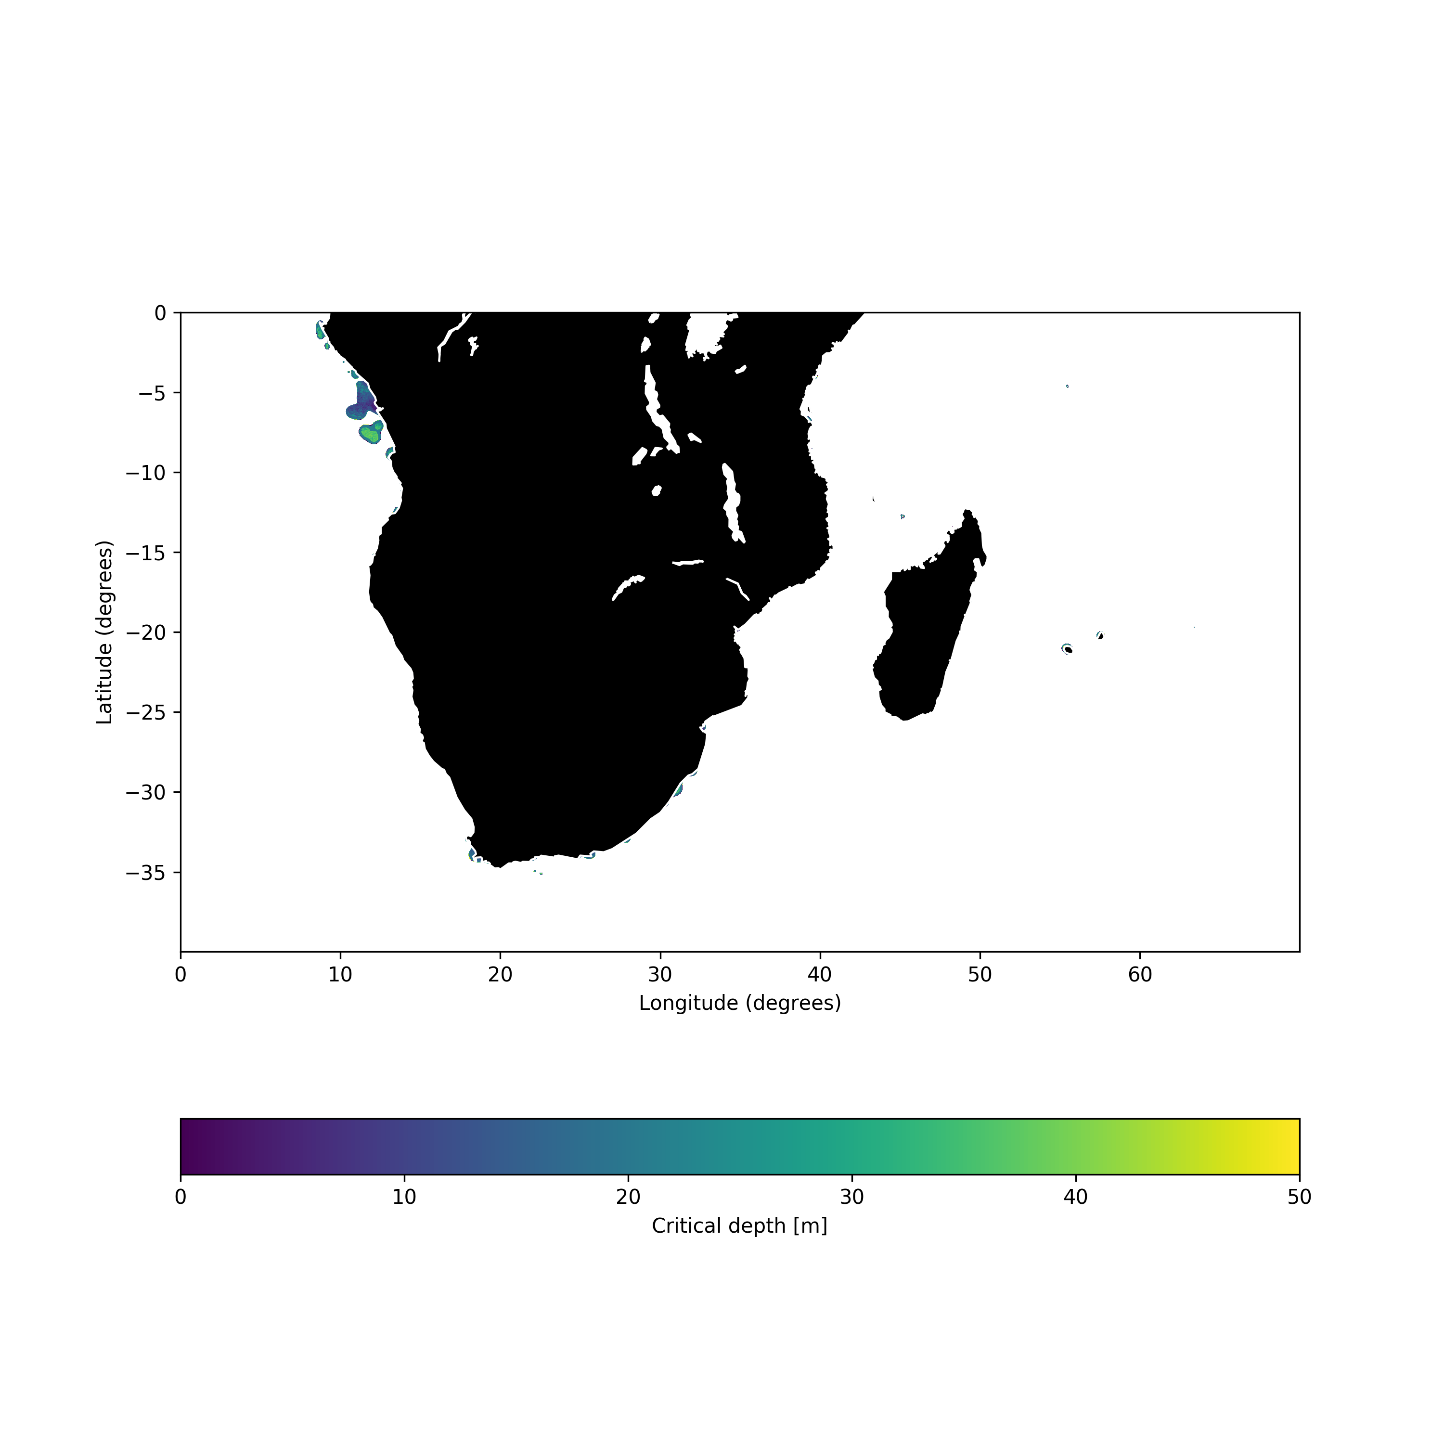


**Figure S7. Critical depth (Zc) for climatological May for southern Africa and Madagascar.** Entire dataset can be downloaded in netCDF format from Pangaea (https://doi.pangaea.de/10.1594/PANGAEA.929749).


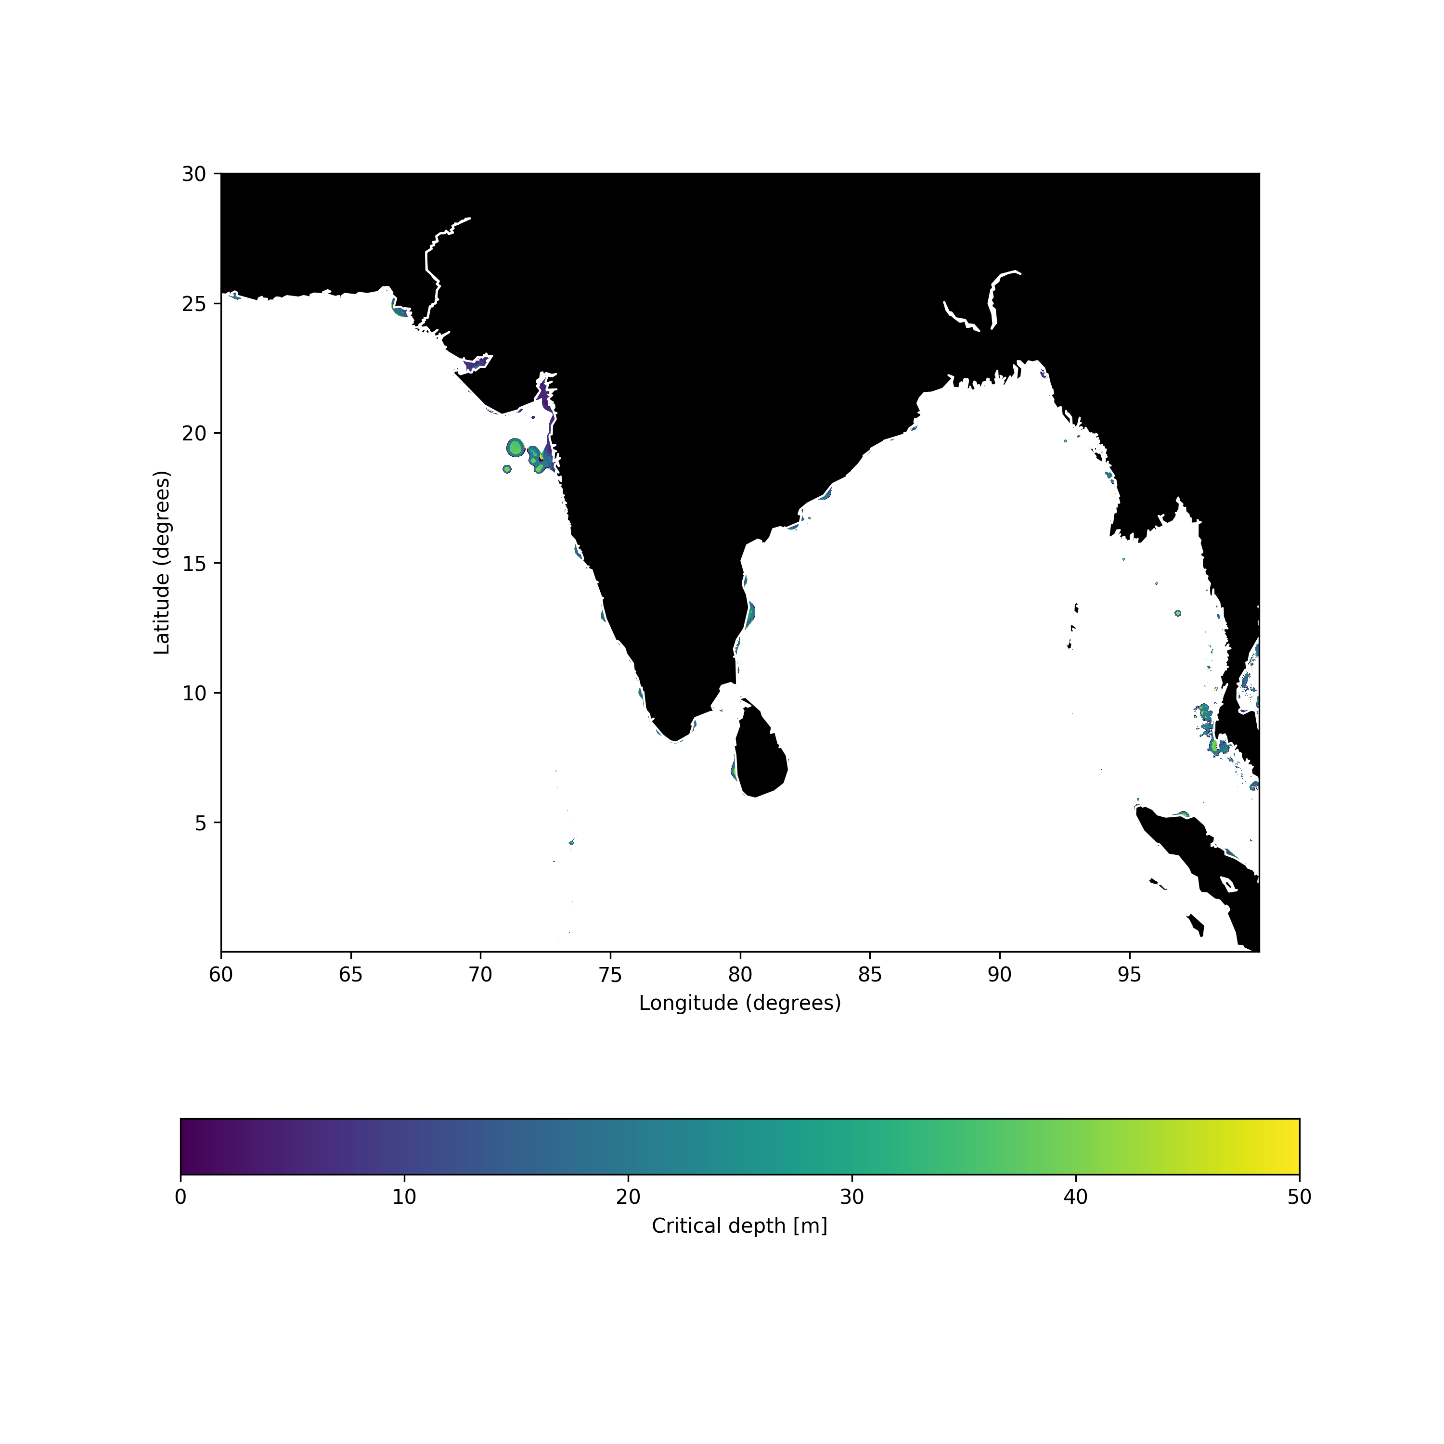


**Figure S8. Critical depth (Zc) for climatological May for northern Indian Ocean.** Entire dataset can be downloaded in netCDF format from Pangaea (https://doi.pangaea.de/10.1594/PANGAEA.929749).


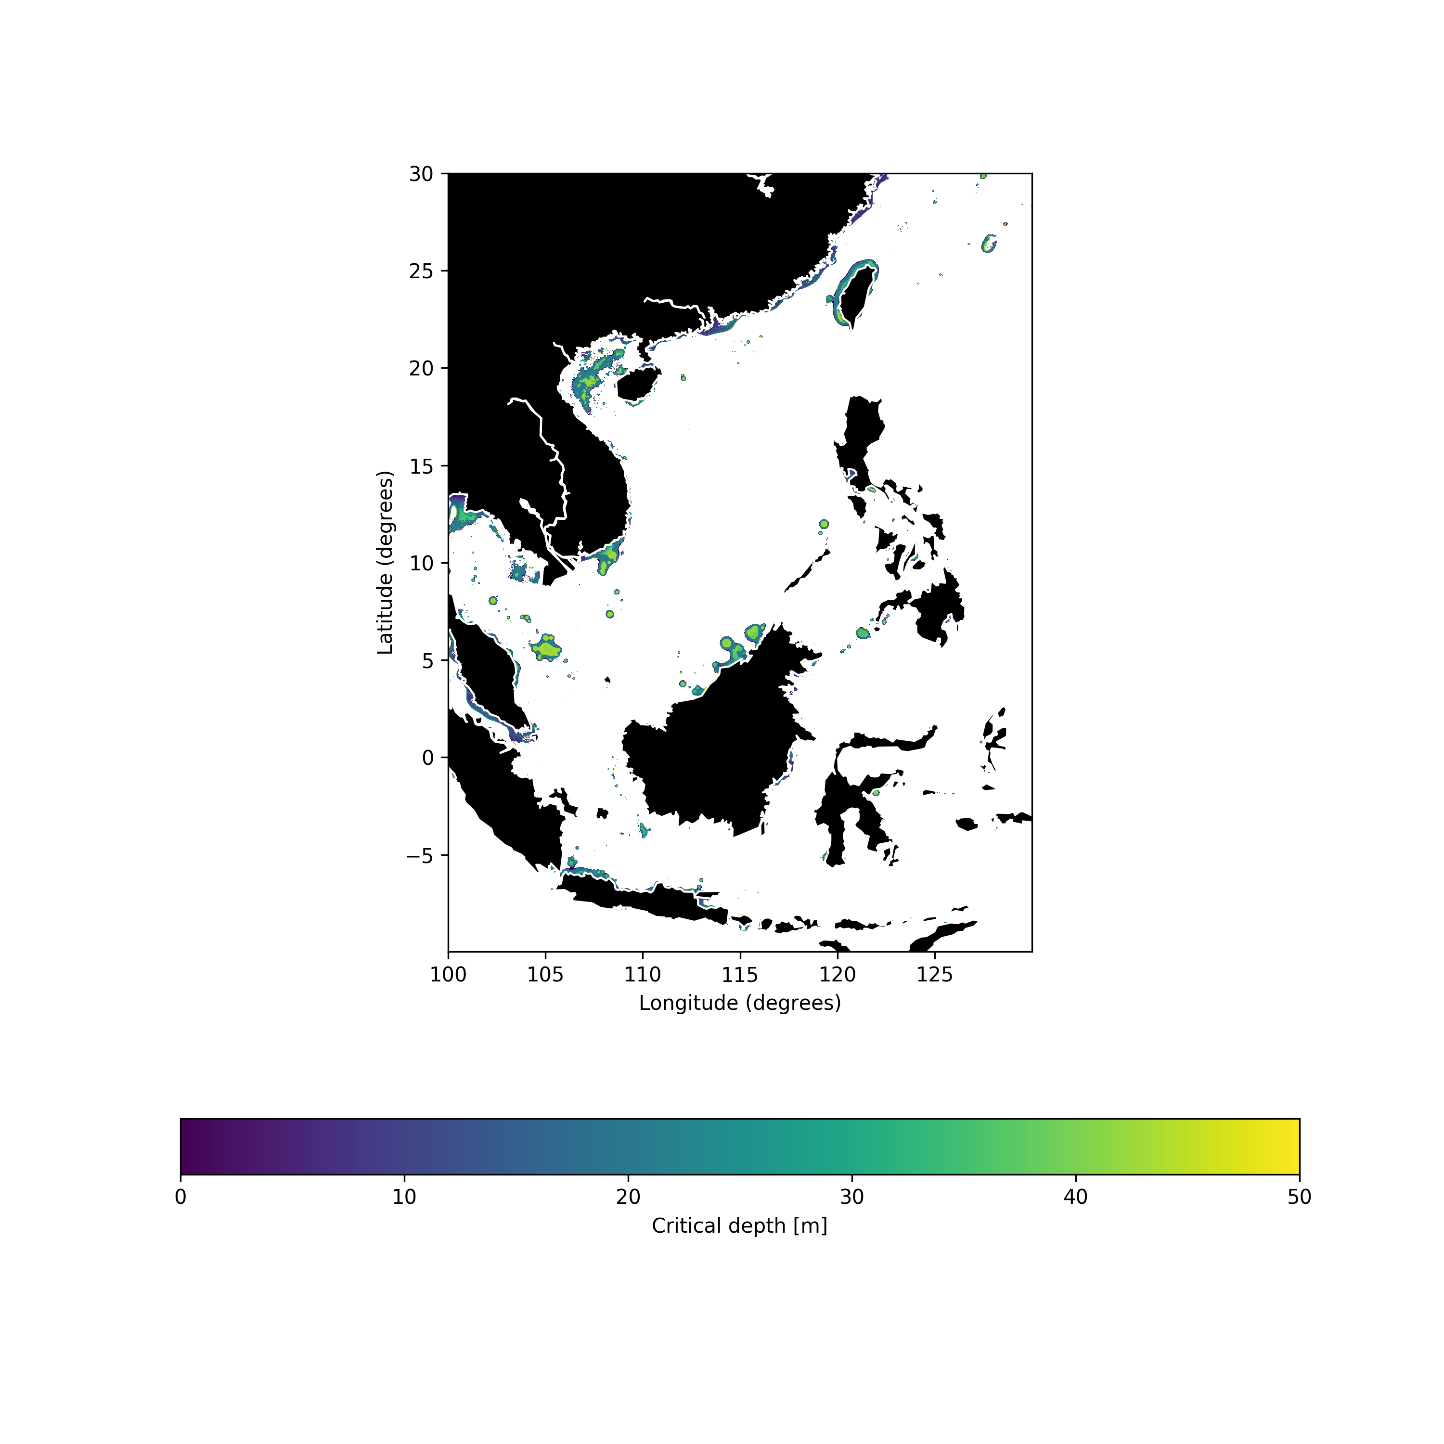


**Figure S9. Critical depth (Zc) for climatological May for Southeast Asia.** Entire dataset can be downloaded in netCDF format from Pangaea (https://doi.pangaea.de/10.1594/PANGAEA.929749).


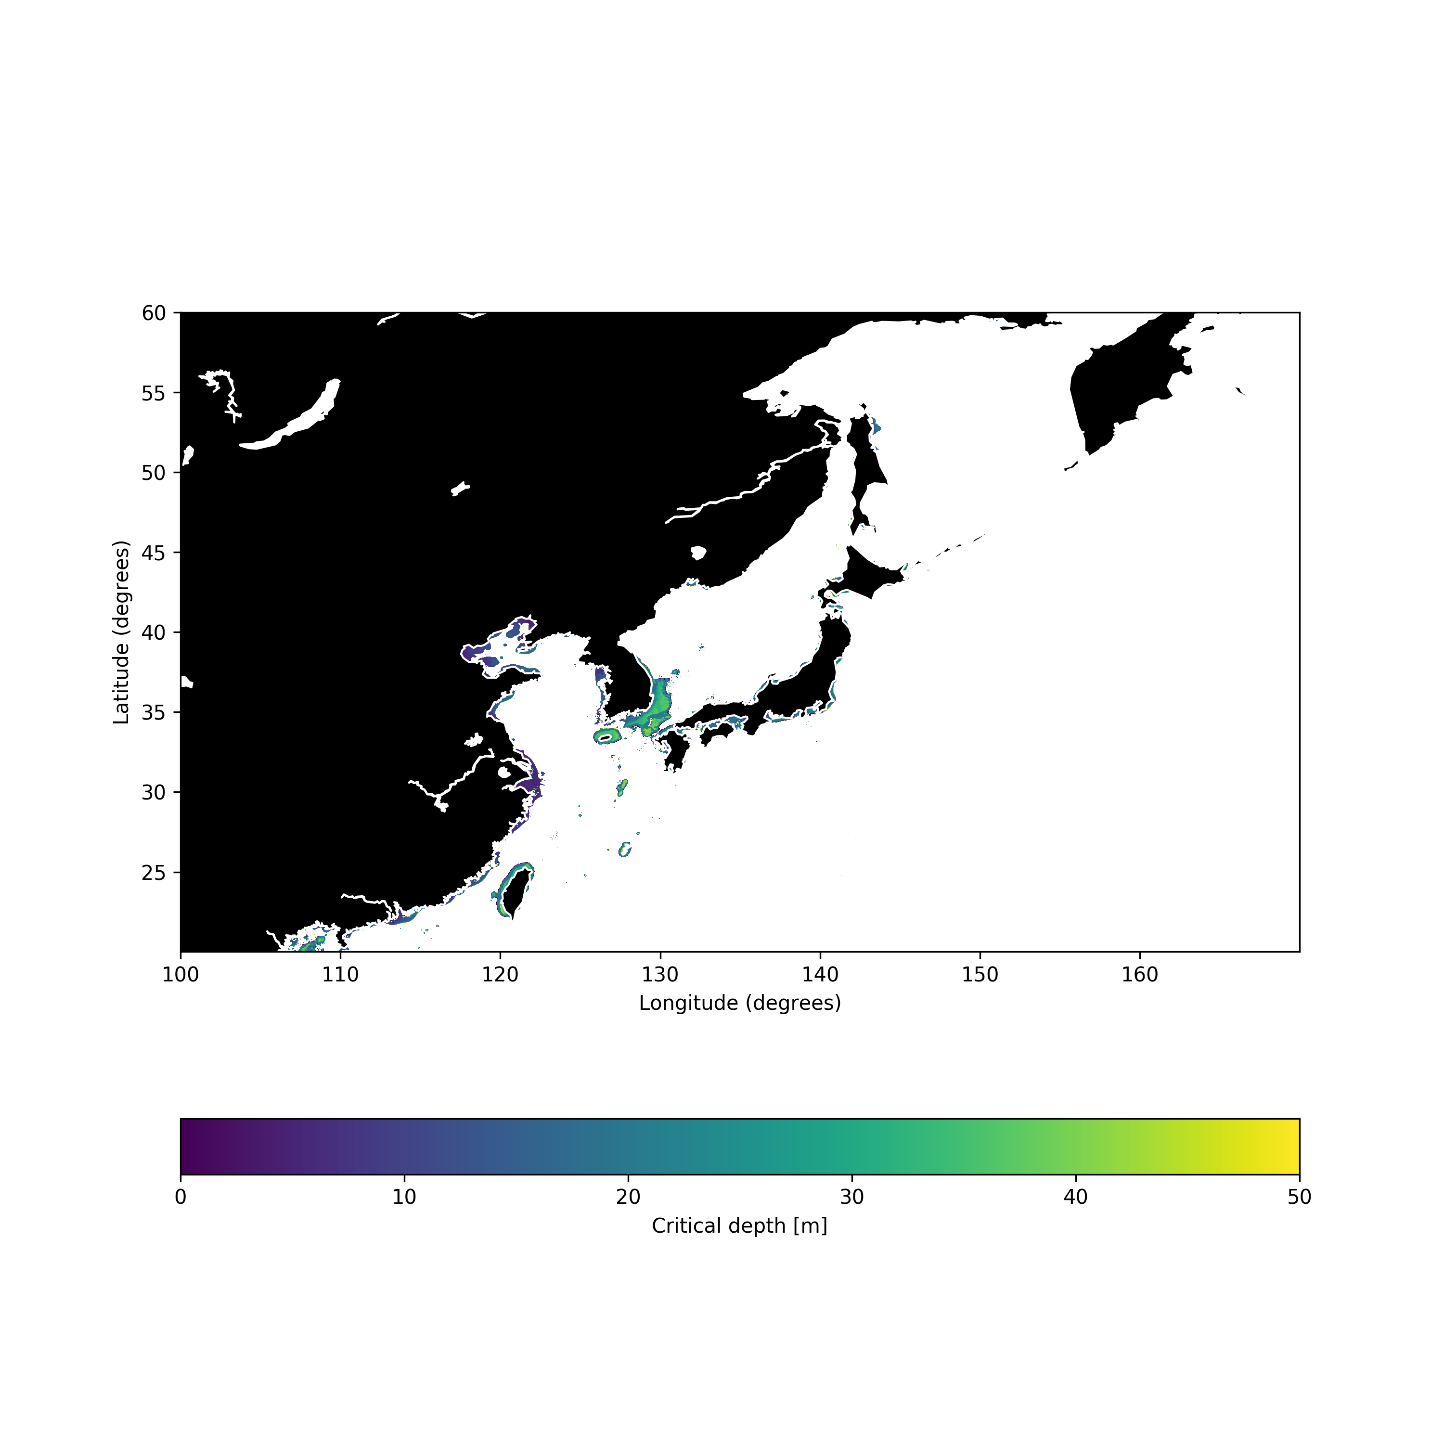


**Figure S10. Critical depth (Zc) for climatological May for northwest Pacific Ocean.** Entire dataset can be downloaded in netCDF format from Pangaea (https://doi.pangaea.de/10.1594/PANGAEA.929749).


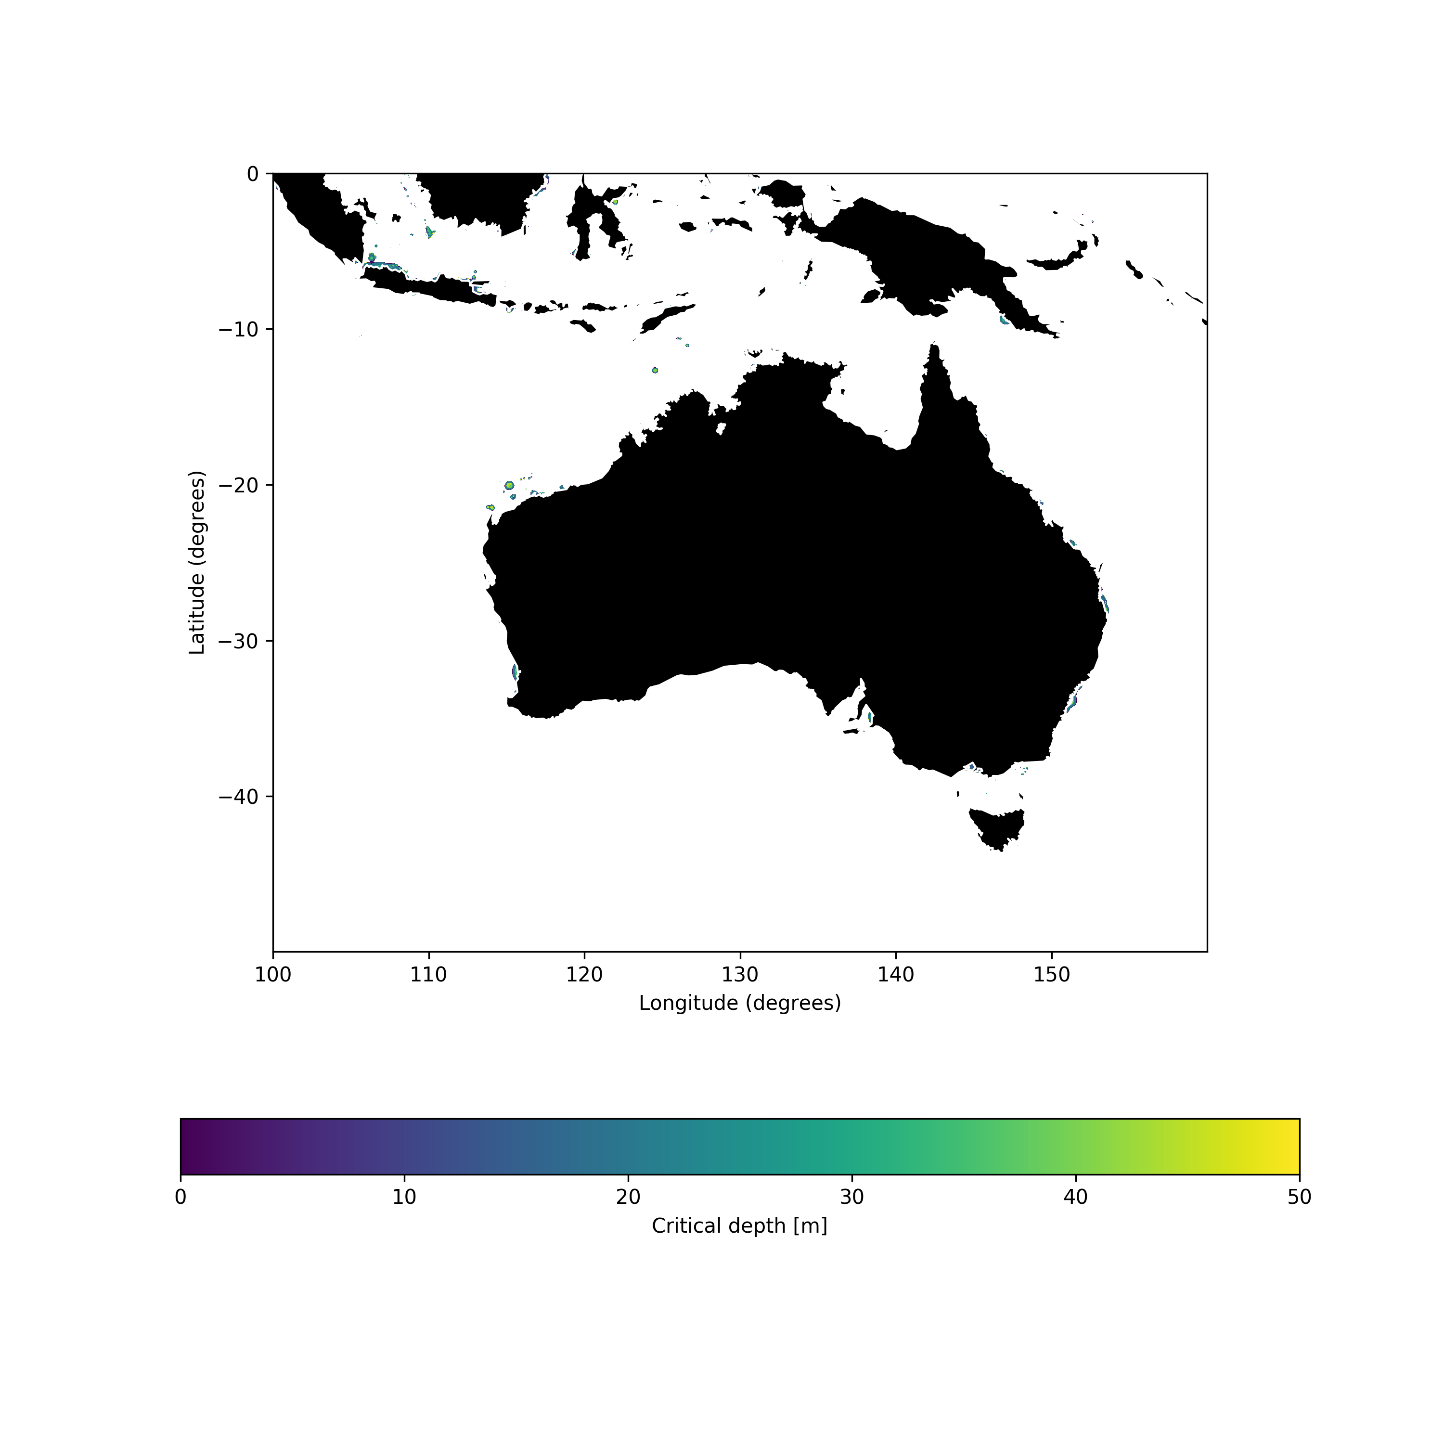


**Figure S11. Critical depth (Zc) for climatological May for Australia and southeast Asia Island chains.** Entire dataset can be downloaded in netCDF format from Pangaea (https://doi.pangaea.de/10.1594/PANGAEA.929749)
