# Supplementary material for: A global atlas of artificial light at night under the sea
Source: Oxford University Press journal article supplement (doi:10.1525/elementa.2021.00049), 2021-12-13
Supplement: supplementary_materials-eez_alan_impact_ranking_tables.xlsx [file supplementary_materials-eez_alan_impact_ranking_tables.xlsx]

## Sheet: Table S1 (EEZ ALAN area)
						Total area affected by ALAN >Zm (km2)
Rank (area)	EEZ Long Descriptor	EEZ ID	Month	N Tiles	N Pixels	>1m	>10m	>20m	>30m	>40m
1	Iranian part of the Persian Gulf	241	Dec	4	119714	71589	68715.8	24780.8	3950.56	359.142
2	South Korean part of the Japan Sea	487	Apr	2	222288	66241.8	64908.1	39567.3	20005.9	2222.88
3	Vietnamese part of the South China Sea	563	Dec	5	785201	65171.7	62816.1	21200.4	10992.8	3926.01
4	Chinese part of the Yellow Sea	72	Oct	3	342731	65118.9	19535.7	1713.65	685.462	342.731
5	United Kingdom part of the North Sea	541	Apr	4	489021	65039.8	54281.3	25918.1	12714.5	2934.13
6	Malaysian part of the South China Sea	319	Dec	2	439335	52280.9	51402.2	41736.8	19330.7	4393.35
7	Chinese part of the South China Sea	71	Dec	5	518534	49260.7	36297.4	10370.7	3111.2	1037.07
8	Japanese part of the Japan Sea	261	Apr	5	708092	46026	46026	32572.2	14869.9	2124.28
9	Nigerian part of the Gulf of Guinea	356	Oct	1	190972	43923.6	39149.3	21770.8	8211.8	954.86
10	United Arab Emirates part of the Persian Gulf	534	Nov	1	53317	42493.6	42387	18714.3	4158.73	1386.24
11	Chinese part of the Eastern China Sea	70	Sep	4	342463	41780.5	5821.87	1369.85	684.926	342.463
12	Italian part of the Adriatic Sea	249	Dec	2	87988	35547.2	34667.3	11438.4	3519.52	791.892
13	Thailand part of the Gulf of Thailand	516	Dec	4	193725	33708.1	33320.7	23247	8717.62	1549.8
14	Italian part of the Tyrrhenian Sea	254	Dec	4	297085	32976.4	32976.4	29411.4	5941.7	1188.34
15	Finnish part of the Gulf of Bothnia	130	May	4	145359	32705.8	11047.3	1162.87	436.077	145.359
16	Mexican part of the Gulf of Mexico	332	Dec	3	887462	31948.6	30173.7	16861.8	9762.08	887.462
17	Qatari part of the Persian Gulf	436	Jan	1	33786	31792.6	31758.8	12636	1250.08	67.572
18	Algerian part of the Mediterranean Sea - Western Basin	4	Dec	2	166920	30045.6	30045.6	27041	8846.76	333.84
19	Saudi Arabian part of the Persian Gulf	468	Nov	2	37437	29987	29537.8	7562.27	973.362	524.118
20	Angolan part of the South Atlantic Ocean	7	Feb	3	447840	29557.4	28213.9	6269.76	895.68	447.84
21	Venezuelan part of the Caribbean Sea	560	Apr	4	491973	29026.4	23122.7	11807.4	4919.73	983.946
22	Libyan part of the Mediterranean Sea - Eastern Basin	311	Jan	2	465651	27939.1	27939.1	27939.1	10244.3	6519.11
23	Portuguese part of the North Atlantic Ocean	432	Mar	3	359864	25550.3	25190.5	10076.2	2519.05	1799.32
24	Indonesian part of the Java Sea	228	Jul	2	618555	25360.8	24742.2	9278.33	4948.44	2474.22
25	Saudi Arabian part of the Red Sea	469	Dec	4	214980	24722.7	24722.7	18703.3	6664.38	3009.72
26	Dutch part of the North Sea	106	Jun	1	109119	22696.8	19095.8	5565.07	1200.31	982.071
27	Spanish part of the Balearic (Iberian Sea)	491	Feb	3	105444	21088.8	21088.8	18874.5	4639.54	738.108
28	Norwegian part of the North Sea	364	Apr	2	245072	20586	20586	8822.59	4166.22	1470.43
29	Taiwanese part of the South China Sea	513	Jan	3	320230	19213.8	18573.3	9286.67	3522.53	960.69
30	Greek part of the Aegean Sea	152	Jan	2	244958	18861.8	18861.8	14697.5	5144.12	1959.66
31	Turkish part of the Black Sea	528	Jan	3	246463	18484.7	18484.7	5668.65	2957.56	0
32	Egyptian part of the Mediterranean Sea - Eastern Basin	116	Feb	2	210926	17717.8	16874.1	10335.4	3163.89	2742.04
33	Omani part of the Gulf of Oman	369	Feb	2	60203	15953.8	15773.2	2528.53	1324.47	361.218
34	Spanish part of the North Atlantic Ocean	494	Mar	2	137813	15297.2	15159.4	4961.27	1791.57	826.878
35	Malaysian part of the Malacca Strait	317	Apr	2	72188	14293.2	11694.5	2454.39	866.256	360.94
36	Moroccan part of the North Atlantic Ocean	341	Feb	4	334303	14040.7	14040.7	8023.27	2340.12	334.303
37	Turkish part of the Sea of Marmara	530	Dec	1	14378	13371.5	13069.6	2199.83	258.804	28.756
38	French part of the English Channel	135	Feb	4	56958	13043.4	12473.8	2506.15	455.664	56.958
39	French part of the Mediterranean Sea - Western Basin	137	Feb	1	105240	12839.3	12839.3	8208.72	2420.52	841.92
40	Polish part of the Baltic Sea	429	Jun	1	51752	12472.2	7400.54	569.272	103.504	51.752
41	South Korean part of the Yellow Sea	488	Oct	1	162135	12322.3	8917.42	1621.35	648.54	162.135
42	Spanish part of the Mediterranean Sea - Western Basin	493	Mar	3	206068	11951.9	11951.9	11127.7	3503.16	412.136
43	Swedish part of the Baltic Sea	506	Mar	2	173172	11429.4	7965.91	865.86	346.344	173.172
44	Danish part of the Kattegat	96	Feb	2	49232	11224.9	7237.1	787.712	295.392	98.464
45	Spanish (Canary Islands) part of the North Atlantic Ocean	489	Oct	3	447491	11187.3	11187.3	10739.8	3132.44	2684.95
46	Italian part of the Ionian Sea	250	Feb	2	113665	11139.2	11139.2	9547.86	1704.97	340.995
47	Japanese part of the Seto Naikai or Inland Sea	265	Dec	1	16756	11008.7	10908.2	1508.04	686.996	83.78
48	Vietnamese part of the Gulf of Thailand	562	Dec	2	60041	10987.5	10927.5	6424.39	1320.9	780.533
49	Congolese part of the South Atlantic Ocean	84	May	2	35023	10892.2	10366.8	2136.4	175.115	0
50	Finnish part of the Gulf of Finland	131	Apr	2	19285	10664.6	501.41	154.28	57.855	19.285
51	United Kingdom part of the Irish Sea and St. George's Channel	539	Mar	1	59799	10405	6518.09	777.387	119.598	0
52	Gabonese part of the South Atlantic Ocean	143	Jun	2	191538	9959.98	9959.98	2873.07	383.076	0
53	Equatorial Guinean part of the Gulf of Guinea	119	Dec	1	57846	9891.67	9718.13	3933.53	1214.77	404.922
54	Kuwaiti part of the Persian Gulf	305	Feb	1	12993	9731.76	7964.71	1559.16	350.811	207.888
55	Israeli part of the Mediterranean Sea - Eastern Basin	248	Dec	1	27731	9539.46	9539.46	9539.46	5047.04	4464.69
56	Spanish part of the Bay of Biscay	492	Mar	1	100535	8746.54	8746.54	3016.05	1809.63	1206.42
57	Tunisian part of the Mediterranean Sea - Eastern Basin	524	Dec	1	81024	8426.5	8183.42	5509.63	1377.41	162.048
58	Uruguayan part of the Rio de La Plata	556	Nov	1	16633	8017.11	282.761	33.266	16.633	16.633
59	Swedish part of the Gulf of Bothnia	507	Sep	3	118831	7961.68	3208.44	237.662	118.831	0
60	Croatian part of the Adriatic Sea	88	Dec	1	78708	7555.97	7555.97	4801.19	1574.16	393.54
61	Japanese part of the Eastern China Sea	260	Dec	4	314124	7538.98	7224.85	5025.98	2198.87	1570.62
62	Egyptian part of the Gulf of Suez	115	Dec	1	10692	7537.86	7537.86	6351.05	2598.16	256.608
63	United Kingdom part of the English Channel	537	Mar	3	57422	7522.28	5110.56	803.908	229.688	57.422
64	Bahraini part of the Persian Gulf	29	Nov	1	8885	7392.32	7294.59	2692.16	346.515	151.045
65	Swedish part of the Kattegat	508	Feb	1	12334	7375.73	3761.87	135.674	12.334	0
66	Democratic Republic of the Congo part of the South Atlantic Ocean	99	Jun	2	13299	7247.95	4960.53	1755.47	172.887	0
67	Norwegian part of the Skagerrak	366	Mar	2	28691	7230.13	6426.78	946.803	114.764	28.691
68	French part of the Bay of Biscay	133	Feb	1	156198	7028.91	4842.14	937.188	312.396	0
69	Cuban part of the North Atlantic Ocean	92	Apr	3	65334	6990.74	6860.07	6533.4	3397.37	3070.7
70	Estonian part of the Gulf of Finland	124	Mar	1	12793	6984.98	486.134	115.137	38.379	12.793
71	Indonesian part of the South China Sea	236	May	3	620117	6821.29	4960.94	3100.59	620.117	620.117
72	Joint regime area Japan / Korea part of the Eastern China Sea	284	Apr	2	98722	6811.82	6811.82	6515.65	2566.77	296.166
73	Canadian part of the The Coastal Waters of Southeast Alaska and British Columbia	62	Oct	3	136008	6800.4	4216.25	680.04	272.016	136.008
74	Bruneian part of the South China Sea	46	Dec	1	44357	6786.62	6697.91	4435.7	1064.57	354.856
75	Colombian part of the Caribbean Sea	80	Oct	3	438249	6573.73	6135.49	3067.74	876.498	438.249
76	Russian Exclusive economic Zone part of the Gulf of Finland	446	Aug	4	20515	6441.71	656.48	225.665	102.575	41.03
77	Thailand part of the Andaman or Burma Sea	515	Dec	2	82494	6187.05	6187.05	6104.56	577.458	494.964
78	Greek part of the Ionian Sea	153	Dec	2	111248	5784.9	5784.9	5117.41	1446.22	444.992
79	Indian part of the Bay of Bengal	214	Aug	4	642177	5779.59	5137.42	2568.71	642.177	0
80	United Kingdom part of the Norwegian Sea	542	Jun	2	106382	5744.63	5744.63	3510.61	531.91	106.382
81	Lebanese part of the Mediterranean Sea - Eastern Basin	308	Dec	1	21108	5741.38	5741.38	5741.38	1857.5	1794.18
82	United States part of the The Coastal Waters of Southeast Alaska and British Columbia	555	Jan	1	7508	5728.6	5225.57	405.432	142.652	52.556
83	Philippines part of the Sulu Sea	427	Jan	4	353572	5657.15	5657.15	3535.72	2828.58	353.572
84	Indonesian part of the Malacca Strait	230	May	2	92135	5528.1	5067.43	2671.91	1105.62	368.54
85	Bahamas part of the North Atlantic Ocean	28	May	3	784644	5492.51	4707.86	3138.58	784.644	784.644
86	Trinidad and Tobago part of the Caribbean Sea	521	Sep	2	19303	5366.23	3918.51	405.363	96.515	38.606
87	Philippines part of the South China Sea	426	Jul	5	659260	5274.08	4614.82	3296.3	1318.52	1318.52
88	Danish part of the North Sea	97	Mar	1	93145	5122.98	4284.67	2049.19	465.725	93.145
89	Irish part of the Irish Sea and St. George's Channel	245	Feb	1	16291	5099.08	4528.9	505.021	114.037	0
90	Turkish part of the Aegean Sea	527	Dec	2	14112	5080.32	5080.32	4628.74	1298.3	296.352
91	Cypriote part of the Mediterranean Sea - Eastern Basin	94	Sep	2	123520	5064.32	5064.32	4940.8	1235.2	1111.68
92	Italian part of the Ligurian Sea	251	Nov	1	17601	4928.28	4928.28	4734.67	721.641	140.808
93	Taiwanese part of the Eastern China Sea	511	Nov	1	31379	4863.74	4863.74	2259.29	1725.85	345.169
94	German part of the Baltic Sea	146	Jun	2	24383	4803.45	3047.88	316.979	48.766	24.383
95	Argentinean part of the Rio de La Plata	14	Nov	1	18990	4481.64	18.99	18.99	0	0
96	South African part of the South Atlantic Ocean	485	Jan	2	494955	4454.6	4454.6	989.91	0	0
97	Russian Exclusive economic Zone part of the Japan Sea	447	Nov	4	479946	4319.51	3839.57	959.892	479.946	0
98	Ghanaian part of the Gulf of Guinea	149	Aug	2	196728	4131.29	4131.29	1573.82	393.456	0
99	United Kingdom part of the Inner Seas off the West Coast of Scotland	538	Mar	1	68770	4126.2	3438.5	618.93	206.31	0
100	Omani part of the Arabian Sea	368	Oct	4	579431	4056.02	3476.59	1158.86	579.431	0
101	Indonesian part of the Makassar Strait	229	May	3	210545	4000.36	2947.63	1052.72	210.545	0
102	German part of the North Sea	148	Jul	1	73589	3826.63	809.479	73.589	0	0
103	Russian Exclusive economic Zone part of the Black Sea	443	Nov	1	72007	3816.37	3816.37	1440.14	720.07	0
104	Cameroonian part of the Gulf of Guinea	49	Jun	1	14492	3811.4	2825.94	855.028	101.444	14.492
105	United Kingdom part of the Bristol Channel	535	Aug	1	8240	3798.64	1565.6	107.12	24.72	0
106	Spanish part of the Alboran Sea	490	Mar	1	31186	3711.13	3711.13	1465.74	498.976	249.488
107	Albanian part of the Adriatic Sea	1	Dec	2	22327	3683.95	3616.97	2433.64	1161	357.232
108	Maltese part of the Mediterranean Sea - Eastern Basin	324	Feb	1	62875	3583.88	3583.88	3583.88	1131.75	943.125
109	Thailand part of the Malacca Strait	517	Mar	2	42012	3571.02	3487	2142.61	210.06	42.012
110	Overlapping claim: Iran / United Arab Emirates part of the Persian Gulf	402	Nov	1	5872	3523.2	3523.2	763.36	399.296	5.872
111	United Arab Emirates part of the Gulf of Oman	533	Mar	1	4580	3512.86	3508.28	1566.36	503.8	100.76
112	Belgian part of the North Sea	34	Sep	1	4245	3404.49	2975.74	318.375	0	0
113	Italian part of the Mediterranean Sea - Western Basin	253	Mar	3	119873	3356.44	3356.44	3236.57	958.984	119.873
114	Ecuadorian part of the South Pacific Ocean	113	Apr	2	176071	3345.35	3169.28	1056.43	528.213	352.142
115	Overlapping claim Ukrainian part of the Black Sea	398	Feb	2	164797	3295.94	3131.14	823.985	494.391	164.797
116	Trinidad and Tobago part of the North Atlantic Ocean	522	Sep	4	58219	3260.26	2328.76	116.438	0	0
117	Russian Exclusive economic Zone part of the White Sea	453	Sep	2	224267	3139.74	224.267	0	0	0
118	Australian part of the Bass Strait	21	Jun	2	152487	3049.74	2897.25	914.922	304.974	0
119	Portuguese (Madeira) part of the North Atlantic Ocean	431	Feb	3	595406	2977.03	2977.03	2977.03	1190.81	595.406
120	Puerto Rican part of the North Atlantic Ocean	435	Oct	2	57184	2859.2	2859.2	2859.2	457.472	457.472
121	Turkish part of the Mediterranean Sea - Eastern Basin	529	Jan	2	68960	2758.4	2758.4	2758.4	551.68	137.92
122	Italian part of the Mediterranean Sea - Eastern Basin	252	Mar	1	88449	2741.92	2741.92	2741.92	265.347	88.449
123	Indian part of the Laccadive Sea	215	Sep	2	435975	2615.85	2615.85	435.975	0	0
124	Reunion part of the Indian Ocean	437	Dec	2	371893	2603.25	2603.25	2603.25	1115.68	743.786
125	Latvian part of the Gulf of Riga	307	Sep	1	13264	2586.48	26.528	0	0	0
126	Puerto Rican part of the Caribbean Sea	434	May	1	107330	2575.92	2575.92	2253.93	214.66	107.33
127	Guadeloupean part of the Caribbean Sea	163	Sep	1	20779	2555.82	2555.82	2140.24	581.812	394.801
128	Tunisian part of the Mediterranean Sea - Western Basin	525	Dec	2	38679	2552.81	2514.14	2320.74	580.185	0
129	Russian Exclusive economic Zone part of the Baltic Sea	440	Mar	2	18472	2364.42	1274.57	36.944	18.472	0
130	French part of the North Sea	139	Oct	1	2372	2338.79	2319.82	85.392	2.372	0
131	Moroccan part of the Alboran Sea	340	Mar	1	16192	2331.65	2331.65	1862.08	340.032	32.384
132	Jamaican part of the Caribbean Sea	257	Mar	2	285533	2284.26	2284.26	1998.73	571.066	285.533
133	Omani part of the Persian Gulf	370	Jan	1	4974	2094.05	2094.05	497.4	174.09	34.818
134	United Kingdom part of the North Atlantic Ocean	540	Jun	5	517165	2068.66	2068.66	1034.33	517.165	0
135	Russian Exclusive economic Zone part of the Sea of Azov	451	Apr	1	19307	1988.62	231.684	57.921	38.614	0
136	Mexican part of the Caribbean Sea	330	Jan	2	99133	1883.53	1784.39	1486.99	495.665	297.399
137	Senegalese part of the North Atlantic Ocean	470	Dec	1	134361	1881.05	1881.05	268.722	134.361	0
138	Myanmar part of the Andaman or Burma Sea	345	Jan	2	309555	1857.33	1857.33	1238.22	309.555	309.555
139	Pakistani part of the Arabian Sea	409	Dec	1	262513	1837.59	1575.08	262.513	0	0
140	Portuguese (Azores) part of the North Atlantic Ocean	430	Jul	2	911636	1823.27	1823.27	911.636	0	0
141	Egyptian part of the Red Sea	117	Jan	1	67243	1815.56	1815.56	1613.83	403.458	134.486
142	Cambodian part of the Gulf of Thailand	48	Jul	2	50378	1813.61	1763.23	1007.56	151.134	50.378
143	Ivory Coast part of the Gulf of Guinea	255	Oct	1	69673	1811.5	1811.5	696.73	278.692	69.673
144	Curacaoan part of the Caribbean Sea	93	Feb	1	25795	1728.27	1728.27	1650.88	644.875	438.515
145	Yemeni part of the Gulf of Aden	569	Aug	2	132024	1716.31	1056.19	132.024	0	0
146	Romanian Exclusive economic Zone part of the Black Sea	438	Apr	2	41335	1653.4	1570.73	206.675	0	0
147	Irish part of the North Atlantic Ocean	246	Feb	3	541308	1623.92	1082.62	541.308	0	0
148	Taiwanese part of the Philippine Sea	512	Jan	1	56841	1591.55	1591.55	1364.18	227.364	0
149	Virgin Islander part of the Caribbean Sea	564	Feb	1	37692	1583.06	1583.06	1507.68	527.688	339.228
150	Swedish part of the Skagerrak	509	Feb	1	12655	1569.22	784.61	113.895	50.62	12.655
151	Martinican part of the Caribbean Sea	326	Apr	2	20582	1523.07	1523.07	1358.41	267.566	205.82
152	Georgian part of the Black Sea	145	Dec	2	31048	1459.26	1459.26	434.672	248.384	0
153	Mauritian part of the Indian Ocean	329	Sep	2	725453	1450.91	1450.91	1450.91	725.453	725.453
154	Syrian part of the Mediterranean Sea - Eastern Basin	510	Dec	1	10732	1384.43	1384.43	1384.43	21.464	21.464
155	Tanzanian part of the Indian Ocean	514	Jan	4	266332	1331.66	1331.66	798.996	266.332	0
156	Lithuanian part of the Baltic Sea	312	Apr	2	11012	1321.44	132.144	0	0	0
157	Cayman Islands part of the Caribbean Sea	65	Jun	4	131808	1318.08	1318.08	1186.27	527.232	395.424
158	Sri Lankan part of the Laccadive Sea	498	Jul	2	106517	1278.2	1278.2	639.102	319.551	106.517
159	Philippines part of the Celebes Sea	424	Aug	2	199530	1197.18	1197.18	1197.18	399.06	199.53
160	New Caledonian part of the Coral Sea	350	Apr	4	1192426	1192.43	1192.43	1192.43	1192.43	0
161	Japanese part of the Sea of Okhotsk	264	Oct	1	47283	1182.08	1182.08	567.396	236.415	94.566
162	South Korean part of the Eastern China Sea	486	Feb	1	64905	1168.29	973.575	519.24	324.525	129.81
163	Honduran part of the Caribbean Sea	202	Nov	1	232906	1164.53	1164.53	465.812	232.906	232.906
164	Canadian part of the Labrador Sea	58	Oct	4	1099291	1099.29	1099.29	0	0	0
165	French part of the Celtic Sea	134	Feb	1	96772	1064.49	870.948	290.316	96.772	0
166	Indonesian part of the Bali Sea	218	Oct	1	36391	1055.34	1055.34	836.993	254.737	109.173
167	Saint Lucia part of the Caribbean Sea	461	Apr	1	14363	1048.5	1048.5	991.047	402.164	344.712
168	Bulgarian part of the Black Sea	47	Nov	2	48530	970.6	922.07	97.06	0	0
169	Ecuadorian part of the North Pacific Ocean	112	May	2	73584	956.592	956.592	294.336	73.584	73.584
170	Iraqi part of the Persian Gulf	242	Apr	1	940	940	287.64	42.3	42.3	1.88
171	Algerian part of the Alboran Sea	3	Jan	1	8419	934.509	917.671	875.576	58.933	16.838
172	Antigua and Barbuda part of the Caribbean Sea	12	Oct	1	11148	925.284	925.284	847.248	390.18	144.924
173	Aruban part of the Caribbean Sea	17	Aug	2	31756	920.924	920.924	889.168	349.316	254.048
174	Latvian part of the Baltic Sea	306	Apr	2	36898	885.552	221.388	0	0	0
175	Malaysian part of the Celebes Sea	315	Jun	1	13004	884.272	845.26	611.188	91.028	65.02
176	Greek part of the Mediterranean Sea - Eastern Basin	154	Feb	3	284370	853.11	853.11	853.11	284.37	0
177	Panamanian part of the North Pacific Ocean	416	Mar	2	202699	810.796	810.796	202.699	202.699	0
178	Australian part of the Timor Sea	27	Oct	4	267555	802.665	535.11	0	0	0
179	Indonesian part of the Banda Sea	219	Apr	2	765011	765.011	765.011	765.011	765.011	765.011
180	Joint regime area Peru / Ecuador part of the South Pacific Ocean	287	Nov	1	13097	759.626	759.626	392.91	379.813	65.485
181	Malaysian part of the Gulf of Thailand	316	Jan	1	8298	755.118	713.628	298.728	141.066	8.298
182	Myanmar part of the Bay of Bengal	346	Mar	2	251654	754.962	754.962	503.308	0	0
183	Indonesian part of the Singapore Strait	235	Jun	1	1416	754.728	590.472	76.464	21.24	9.912
184	Cuban part of the Caribbean Sea	90	Dec	4	246883	740.649	740.649	493.766	0	0
185	Saint Kitts and Nevis part of the Caribbean Sea	460	Sep	1	9412	724.724	724.724	715.312	188.24	178.828
186	United States (Alaska) part of the Chukchi Sea	546	Sep	1	241422	724.266	241.422	0	0	0
187	Canadian part of the Bay of Fundy	52	Dec	1	20408	714.28	224.488	61.224	20.408	0
188	Dominican Republic part of the Caribbean Sea	104	Dec	2	178130	712.52	712.52	712.52	0	0
189	French part of the Tyrrhenian Sea	140	Nov	2	8635	682.165	682.165	457.655	94.985	34.54
190	East Timorian part of the Timor Sea	109	Dec	2	67947	679.47	679.47	679.47	203.841	203.841
191	Mexican part of the Gulf of California	331	Feb	3	217414	652.242	652.242	217.414	217.414	0
192	Faeroe part of the North Atlantic Ocean	126	May	2	319975	639.95	639.95	319.975	319.975	0
193	Turks and Caicos part of the North Atlantic Ocean	531	May	2	105540	633.24	633.24	527.7	211.08	105.54
194	Overlapping claim Western Saharan part of the North Atlantic Ocean	400	Jun	2	311038	622.076	622.076	0	0	0
195	Barbados part of the Caribbean Sea	31	Mar	2	13737	618.165	618.165	576.954	109.896	68.685
196	Montenegrin Exclusive economic Zone part of the Adriatic Sea	338	Mar	1	7446	610.572	610.572	290.394	59.568	29.784
197	Overlapping claim Mayotte: France / Comoros part of the Mozambique Channel	388	Oct	1	67773	609.957	609.957	474.411	135.546	0
198	Malaysian part of the Singapore Strait	318	Jun	1	1940	605.28	595.58	345.32	151.32	58.2
199	Panamanian part of the Caribbean Sea	415	Jul	4	151305	605.22	605.22	302.61	151.305	0
200	Overlapping claim Palestinian part of the Mediterranean Sea - Eastern Basin	413	Dec	1	600	598.8	598.8	598.8	412.8	205.2
201	Anguilla part of the Caribbean Sea	8	Dec	1	6144	595.968	595.968	571.392	233.472	135.168
202	British Virgin Islands part of the Caribbean Sea	44	Oct	1	7632	587.664	587.664	580.032	106.848	83.952
203	United Kingdom part of the Celtic Sea	536	Mar	2	116472	582.36	582.36	232.944	0	0
204	Danish part of the Baltic Sea	95	Feb	1	29044	580.88	377.572	116.176	29.044	0
205	Mauritanian part of the North Atlantic Ocean	328	Dec	2	191628	574.884	574.884	191.628	0	0
206	Gabonese part of the Gulf of Guinea	142	Apr	2	23808	547.584	476.16	95.232	47.616	0
207	Indonesian part of the Celebes Sea	221	Jun	2	273770	547.54	273.77	0	0	0
208	Overlapping claim Ukrainian part of the Sea of Azov	399	Dec	1	31561	536.537	126.244	31.561	0	0
209	Bangladeshi part of the Bay of Bengal	30	Dec	4	132158	528.632	0	0	0	0
210	Indonesian part of the Ceram Sea	222	Apr	2	172521	517.563	345.042	0	0	0
211	Indonesian part of the South Pacific Ocean	237	Oct	2	250260	500.52	500.52	500.52	250.26	0
212	Moroccan part of the Strait of Gibraltar	342	Dec	1	810	485.19	478.71	379.08	250.29	17.82
213	Iranian part of the Gulf of Oman	240	Jan	2	59562	476.496	416.934	59.562	59.562	0
214	American Samoa part of the South Pacific Ocean	5	Apr	2	464342	464.342	464.342	464.342	0	0
215	Grenadian part of the Caribbean Sea	162	Sep	1	25562	460.116	460.116	255.62	102.248	51.124
216	Icelandic part of the Greenland Sea	206	Sep	2	455910	455.91	455.91	0	0	0
217	Jersey part of the English Channel	268	Jun	1	2459	454.915	454.915	221.31	132.786	44.262
218	Albanian part of the Ionian Sea	2	Jul	1	1447	452.911	439.888	425.418	248.884	193.898
219	Dominican Republic part of the North Atlantic Ocean	105	Dec	4	218710	437.42	437.42	218.71	0	0
220	Danish part of the Skagerrak	98	Mar	2	19477	428.494	331.109	19.477	0	0
221	French Guiana part of the North Atlantic Ocean	132	Dec	2	142082	426.246	0	0	0	0
222	Djiboutian part of the Gulf of Aden	100	Aug	1	5583	413.142	413.142	117.243	22.332	5.583
223	Irish part of the Inner Seas off the West Coast of Scotland	244	Mar	1	10047	401.88	321.504	120.564	70.329	10.047
224	Spanish part of the Strait of Gibraltar	495	Nov	1	619	386.256	380.066	295.263	81.089	29.712
225	Egyptian part of the Gulf of Aqaba	114	Oct	1	1507	367.708	366.201	311.949	96.448	46.717
226	Maldives part of the Laccadive Sea	323	Oct	1	364238	364.238	364.238	364.238	0	0
227	Belizean part of the Caribbean Sea	35	Dec	1	35819	358.19	286.552	71.638	0	0
228	Vanuatu part of the Coral Sea	558	Jul	2	353116	353.116	353.116	353.116	0	0
229	East Timorian part of the Banda Sea	107	Dec	1	5076	340.092	340.092	340.092	111.672	111.672
230	German part of the Kattegat	147	Mar	2	899	318.246	130.355	34.162	18.879	7.192
231	Guyanese part of the North Atlantic Ocean	172	Dec	2	145353	290.706	0	0	0	0
232	Estonian part of the Gulf of Riga	125	Mar	1	19211	288.165	57.633	19.211	19.211	0
233	Overlapping claim Kuril Islands: Japan / Russia part of the Sea of Okhotsk	384	Dec	1	131443	262.886	262.886	131.443	131.443	0
234	Sri Lankan part of the Bay of Bengal	496	May	3	261742	261.742	261.742	261.742	0	0
235	Indonesian part of the Timor Sea	238	Jul	3	130419	260.838	260.838	260.838	0	0
236	Yemeni part of the Red Sea	570	Oct	1	34919	244.433	244.433	69.838	69.838	0
237	Kenyan part of the Indian Ocean	297	Jan	2	120216	240.432	240.432	120.216	0	0
238	Indonesian part of the Molukka Sea	231	Jul	2	239940	239.94	239.94	239.94	0	0
239	Dominican part of the Caribbean Sea	102	Dec	1	15965	239.475	239.475	223.51	79.825	63.86
240	Bonaire part of the Caribbean Sea	38	Feb	1	12884	231.912	231.912	206.144	77.304	64.42
241	Guinean part of the North Atlantic Ocean	171	Dec	2	109357	218.714	109.357	0	0	0
242	Sudanese part of the Red Sea	500	Jul	2	65747	197.241	131.494	0	0	0
243	Haitian part of the Caribbean Sea	173	Nov	1	96520	193.04	193.04	96.52	0	0
244	Barbados part of the North Atlantic Ocean	32	Jul	1	191695	191.695	191.695	0	0	0
245	Malaysian part of the Sulu Sea	320	Sep	1	14421	187.473	173.052	43.263	14.421	0
246	Saint Vincent and the Grenadines part of the Caribbean Sea	462	Sep	1	36136	180.68	180.68	180.68	72.272	0
247	Guernsey part of the English Channel	169	Oct	2	8971	179.42	179.42	44.855	17.942	0
248	Indonesian part of the Andaman or Burma Sea	216	Nov	1	35814	179.07	179.07	143.256	35.814	0
249	Sierra Leonian part of the North Atlantic Ocean	472	Oct	1	173414	173.414	173.414	0	0	0
250	Overlapping claim Senkaku Islands: Japan / China / Taiwan part of the Eastern China Sea	394	Feb	1	84785	169.57	169.57	169.57	0	0
251	Colombian (Serranilla) part of the Caribbean Sea	79	Dec	2	2588	147.516	134.576	54.348	18.116	5.176
252	Samoan part of the South Pacific Ocean	463	Aug	1	143937	143.937	143.937	0	0	0
253	Surinamese part of the North Atlantic Ocean	501	Dec	1	142427	142.427	0	0	0	0
254	Gambian part of the North Atlantic Ocean	144	Dec	1	15754	141.786	47.262	0	0	0
255	Uruguayan part of the South Atlantic Ocean	557	Nov	1	137181	137.181	0	0	0	0
256	Sint-Eustatius part of the Caribbean Sea	474	Dec	1	1565	131.46	131.46	129.895	40.69	40.69
257	Greek part of the Adriatic Sea	151	Dec	2	2507	127.857	127.857	102.787	12.535	5.014
258	Overlapping claim Gibraltarian part of the Alboran Sea	378	Dec	1	148	117.068	116.032	101.972	60.976	3.996
259	Costa Rican part of the Caribbean Sea	86	Nov	2	37723	113.169	113.169	37.723	37.723	0
260	Antigua and Barbuda part of the North Atlantic Ocean	13	Aug	3	113120	113.12	0	0	0	0
261	Tunisian part of the Tyrrhenian Sea	526	Nov	1	396	112.068	91.872	66.132	24.948	9.108
262	Indonesian part of the Savu Sea	234	Feb	3	106015	106.015	106.015	0	0	0
263	Joint regime area Argentina / Uruguay part of the South Atlantic Ocean	271	Dec	1	51444	102.888	0	0	0	0
264	Anguilla part of the North Atlantic Ocean	9	Apr	2	95820	95.82	95.82	95.82	0	0
265	United States (Alaska) part of the The Coastal Waters of Southeast Alaska and British Columbia	549	Mar	1	47381	94.762	94.762	47.381	0	0
266	Saint-Martin part of the Caribbean Sea	457	Sep	1	847	92.323	90.629	72.842	5.929	1.694
267	Saint-Barthelemy part of the Caribbean Sea	455	Oct	1	2987	89.61	89.61	86.623	23.896	23.896
268	Sint-Maarten part of the Caribbean Sea	475	Dec	1	451	87.945	87.043	87.043	1.804	0.902
269	Saudi Arabian part of the Gulf of Aqaba	467	Dec	1	439	75.947	75.947	74.191	13.17	7.902
270	Honduran part of the North Pacific Ocean	203	Jan	1	1458	74.358	74.358	30.618	11.664	5.832
271	French part of the Ligurian Sea	136	Jun	1	4432	70.912	66.48	66.48	26.592	13.296
272	Virgin Islander part of the North Atlantic Ocean	565	Dec	1	1457	68.479	65.565	40.796	20.398	4.371
273	Indonesian part of the Gulf of Boni	224	Feb	1	32701	65.402	65.402	32.701	32.701	0
274	Togolese part of the Gulf of Guinea	518	Aug	1	13010	52.04	52.04	13.01	13.01	0
275	Ghanaian part of the North Atlantic Ocean	150	Dec	2	46917	46.917	46.917	0	0	0
276	Saint-Pierre and Miquelon part of the Gulf of St. Lawrence	458	Dec	1	6195	43.365	43.365	18.585	6.195	6.195
277	Joint regime area Nigeria / Sao Tome and Principe part of the Gulf of Guinea	286	Aug	1	34535	34.535	34.535	34.535	0	0
278	Saint-Barthelemy part of the North Atlantic Ocean	456	Sep	1	728	31.304	31.304	23.296	5.096	2.184
279	North Korean part of the Yellow Sea	360	Dec	1	28952	28.952	0	0	0	0
280	Overlapping claim Liancourt Rocks: Japan / South Korea part of the Japan Sea	385	Apr	1	1305	28.71	28.71	14.355	3.915	2.61
281	Guatemalan part of the Caribbean Sea	167	Dec	1	810	28.35	26.73	5.67	0	0
282	Singaporean part of the Singapore Strait	473	Jun	1	946	25.542	19.866	11.352	4.73	1.892
283	Colombian (Bajo Nuevo) part of the Caribbean Sea	76	Dec	1	1268	25.36	22.824	13.948	6.34	0
284	Saba part of the Caribbean Sea	454	Sep	1	8418	25.254	25.254	25.254	8.418	0
285	Djiboutian part of the Red Sea	101	Sep	1	298	24.138	24.138	16.986	3.874	0
286	Martinican part of the North Atlantic Ocean	327	Dec	2	23633	23.633	23.633	23.633	23.633	0
287	Iranian part of the Arabian Sea	239	Dec	1	5737	22.948	22.948	5.737	0	0
288	Joint regime area Japan / Korea part of the Japan Sea	285	Apr	1	1084	22.764	21.68	19.512	6.504	1.084
289	Equatorial Guinean part of the North Atlantic Ocean	120	Nov	1	10870	21.74	21.74	0	0	0
290	Finnish part of the Baltic Sea	129	Aug	2	19501	19.501	19.501	0	0	0
291	Joint regime area Argentina / Uruguay part of the Rio de La Plata	270	Dec	1	278	16.124	3.892	1.112	1.112	1.112
292	Haitian part of the North Atlantic Ocean	174	Feb	2	13595	13.595	13.595	13.595	13.595	0
293	Dominican part of the North Atlantic Ocean	103	Jun	2	11410	11.41	11.41	11.41	0	0
294	Montserrat part of the Caribbean Sea	339	Dec	1	6309	6.309	6.309	6.309	0	0
295	East Timorian part of the Savu Sea	108	Dec	1	217	6.076	6.076	6.076	3.906	3.906
296	Joint regime area Colombia / Dominican Republic part of the Caribbean Sea	273	Dec	1	4125	4.125	4.125	4.125	0	0
297	Indonesian part of the Bay of Bengal	220	Dec	1	3445	3.445	3.445	0	0	0
298	Oecussi Ambeno part of the Savu Sea	367	Dec	1	1035	2.07	2.07	2.07	0	0
299	Overlapping claim: Venezuela / Aruba / Dominican Republic part of the Caribbean Sea	407	Dec	2	256	2.048	2.048	2.048	2.048	2.048
300	Overlapping claim Mayotte: France / Comoros part of the Indian Ocean	387	Dec	1	1461	1.461	0	0	0	0
301	Joint regime area Sweden / Norway part of the Skagerrak	290	Oct	1	165	0.99	0.99	0	0	0
302	Pakistani part of the Gulf of Oman	410	Dec	1	154	0.924	0.924	0	0	0
303	Joint regime area Spain / France part of the Bay of Biscay	289	Dec	1	900	0.9	0.9	0	0	0
304	Costa Rican part of the North Pacific Ocean	87	Dec	3	610352	0	0	0	0	0
305	Australian part of the Arafura Sea	20	Mar	3	650832	0	0	0	0	0
306	Indonesian part of the Halmahera Sea	226	Feb	4	76724	0	0	0	0	0
307	Nauruan part of the South Pacific Ocean	349	Dec	1	199934	0	0	0	0	0
308	Venezuelan part of the North Atlantic Ocean	561	Nov	3	28064	0	0	0	0	0
309	Sri Lankan part of the Indian Ocean	497	Jun	2	206718	0	0	0	0	0
310	Indonesian part of the Arafura Sea	217	Sep	4	475640	0	0	0	0	0
311	Irish part of the Celtic Sea	243	Feb	3	111040	0	0	0	0	0
312	Solomon Islands part of the Solomon Sea	478	Sep	4	294287	0	0	0	0	0
313	British Virgin Islands part of the North Atlantic Ocean	45	Dec	2	82488	0	0	0	0	0
314	Indonesian part of the Flores Sea	223	Feb	2	107189	0	0	0	0	0
315	Canadian part of the North Pacific Ocean	61	Oct	3	531371	0	0	0	0	0
316	Overlapping claim: Sudan / Egypt part of the Red Sea	405	Dec	1	20415	0	0	0	0	0
317	Namibian part of the South Atlantic Ocean	347	Apr	3	612668	0	0	0	0	0
318	Comoran part of the Mozambique Channel	83	Jun	1	93523	0	0	0	0	0
319	Overlapping claim: Puerto Rico / Dominican Republic part of the North Atlantic Ocean	404	Dec	2	18635	0	0	0	0	0
320	North Korean part of the Japan Sea	359	Dec	4	120967	0	0	0	0	0
321	Cuban part of the Gulf of Mexico	91	Apr	1	93763	0	0	0	0	0
322	French part of the North Atlantic Ocean	138	Mar	1	83088	0	0	0	0	0
323	Estonian part of the Baltic Sea	123	Oct	1	32875	0	0	0	0	0
324	Madagascan part of the Mozambique Channel	314	Mar	2	428648	0	0	0	0	0
325	Sao Tome and Principe part of the Gulf of Guinea	464	Jan	2	99180	0	0	0	0	0
326	Canadian part of the Davis Strait	54	Jun	3	989397	0	0	0	0	0
327	Indonesian part of the Gulf of Tomini	225	Dec	2	57081	0	0	0	0	0
328	Papua New Guinean part of the Arafura Sea	417	Nov	3	20302	0	0	0	0	0
329	Vanuatu part of the South Pacific Ocean	559	Oct	2	137687	0	0	0	0	0
330	Cape Verdean part of the North Atlantic Ocean	64	Dec	1	14437	0	0	0	0	0
331	Somali part of the Gulf of Aden	481	Nov	2	132232	0	0	0	0	0
332	Ecuadorian (Galapagos) part of the South Pacific Ocean	111	Mar	4	504905	0	0	0	0	0
333	El Salvador part of the North Pacific Ocean	118	Dec	2	101637	0	0	0	0	0
334	Indian (Andaman and Nicobar Islands) part of the Bay of Bengal	211	Sep	4	452489	0	0	0	0	0
335	Indian (Andaman and Nicobar Islands) part of the Indian Ocean	212	Nov	1	48801	0	0	0	0	0
336	Overlapping claim Kuril Islands: Japan / Russia part of the North Pacific Ocean	383	Dec	2	191470	0	0	0	0	0
337	Eritrean part of the Red Sea	122	Dec	2	85399	0	0	0	0	0
338	Joint regime area United Kingdom / Denmark (Faeroe Islands) part of the North Atlantic Ocean	291	Nov	3	14039	0	0	0	0	0
339	Icelandic part of the Norwegian Sea	208	Sep	2	344186	0	0	0	0	0
340	Indian (Andaman and Nicobar Islands) part of the Andaman or Burma Sea	210	Oct	2	235947	0	0	0	0	0
341	Colombian part of the North Pacific Ocean	81	Nov	2	361340	0	0	0	0	0
342	Papua New Guinean part of the Bismarck Sea	418	May	2	369384	0	0	0	0	0
343	Maldives part of the Indian Ocean	322	Dec	1	61961	0	0	0	0	0
344	Faeroe part of the Norwegian Sea	127	May	1	294863	0	0	0	0	0
345	Nicaraguan part of the Caribbean Sea	354	Dec	2	157531	0	0	0	0	0
346	Papua New Guinean part of the Solomon Sea	421	May	4	534169	0	0	0	0	0
347	Joint regime area Senegal / Guinea Bissau part of the North Atlantic Ocean	288	Dec	2	35789	0	0	0	0	0
348	Tongan part of the South Pacific Ocean	520	Dec	1	358210	0	0	0	0	0
349	Palau part of the Philippine Sea	412	Sep	2	307300	0	0	0	0	0
350	Guinea Bissau part of the North Atlantic Ocean	170	Oct	2	114523	0	0	0	0	0
351	Liberian part of the North Atlantic Ocean	310	Dec	2	273061	0	0	0	0	0
352	Palau part of the North Pacific Ocean	411	Dec	2	317301	0	0	0	0	0
353	Ivory Coast part of the North Atlantic Ocean	256	Dec	1	107817	0	0	0	0	0
354	Guatemalan part of the North Pacific Ocean	168	Dec	1	116796	0	0	0	0	0
355	Equatorial Guinean part of the South Atlantic Ocean	121	Jul	1	257659	0	0	0	0	0
356	Yemeni part of the Arabian Sea	568	Dec	2	412715	0	0	0	0	0
357	United States part of the Bay of Fundy	551	Dec	1	151	0	0	0	0	0
358	Tokelau part of the South Pacific Ocean	519	Dec	2	38018	0	0	0	0	0
359	Somali part of the Indian Ocean	482	Dec	4	688096	0	0	0	0	0
360	Somali part of the Arabian Sea	480	Dec	2	39686	0	0	0	0	0
361	Solomon Islands part of the Coral Sea	477	Dec	3	456712	0	0	0	0	0
362	Sao Tome and Principe part of the South Atlantic Ocean	466	Dec	1	23073	0	0	0	0	0
363	Sao Tome and Principe part of the North Atlantic Ocean	465	Dec	1	10403	0	0	0	0	0
364	Saint-Pierre and Miquelon part of the North Atlantic Ocean	459	Dec	1	8846	0	0	0	0	0
365	Protected Zone established under the Torres Strait Treaty part of the Coral Sea	433	Dec	1	2745	0	0	0	0	0
366	Overlapping claim: Trinidad and Tobago / Venezuela / Guyana part of the North Atlantic Ocean	406	Dec	1	1864	0	0	0	0	0
367	Overlapping claim: Kenya / Somalia part of the Indian Ocean	403	Dec	1	51052	0	0	0	0	0
368	Overlapping claim: Canada / USA part of the Beaufort Sea	401	Dec	1	584	0	0	0	0	0
369	Overlapping claim South China Sea part of the South China Sea	395	Dec	3	381216	0	0	0	0	0
370	Overlapping claim Navassa Island: USA / Haiti / Jamaica part of the Caribbean Sea	390	Dec	1	12989	0	0	0	0	0
371	Overlapping claim Ile Tromelin: Reunion / Madagascar / Mauritus part of the Indian Ocean	382	Dec	1	307213	0	0	0	0	0
372	Overlapping claim Glorioso Islands: France / Madagascar part of the Mozambique Channel	381	Dec	1	15882	0	0	0	0	0
373	Overlapping claim Glorioso Islands: France / Madagascar part of the Indian Ocean	380	Dec	1	24817	0	0	0	0	0
374	Overlapping claim Falkland / Malvinas Islands: UK / Argentina part of the South Atlantic Ocean	377	Dec	2	219973	0	0	0	0	0
375	Norfolk Island part of the South Pacific Ocean	358	Dec	1	295425	0	0	0	0	0
376	Niue part of the South Pacific Ocean	357	Dec	2	218209	0	0	0	0	0
377	Nicaraguan part of the North Pacific Ocean	355	Dec	2	67210	0	0	0	0	0
378	New Caledonian part of the South Pacific Ocean	351	Dec	1	222732	0	0	0	0	0
379	Micronesian part of the South Pacific Ocean	336	Dec	1	63680	0	0	0	0	0
380	Micronesian part of the Philippine Sea	335	Dec	1	33030	0	0	0	0	0
381	Maldives part of the Arabian Sea	321	Dec	1	270360	0	0	0	0	0
382	Kiribati (Line Islands) part of the South Pacific Ocean	302	Dec	2	332587	0	0	0	0	0
383	Kerguelen part of the Indian Ocean	298	Dec	2	655241	0	0	0	0	0
384	Juan de Nova part of the Mozambique Channel	296	Dec	1	67900	0	0	0	0	0
385	Joint regime area United States / Russia part of the North Pacific Ocean	294	Dec	1	214	0	0	0	0	0
386	Joint regime area Iceland / Norway (Jan Mayen) part of the Norwegian Sea	282	Dec	2	5920	0	0	0	0	0
387	Joint regime area Iceland / Norway (Jan Mayen) part of the Greenland Sea	281	Dec	2	1344	0	0	0	0	0
388	Joint regime area Iceland / Denmark (Faeroe Islands) part of the North Atlantic Ocean	280	Dec	1	1184	0	0	0	0	0
389	Joint regime area Ecuador / Colombia part of the North Pacific Ocean	277	Dec	2	10652	0	0	0	0	0
390	Joint regime area Costa Rica / Ecuador (Galapagos) part of the North Pacific Ocean	275	Dec	2	4708	0	0	0	0	0
391	Joint regime area Colombia / Jamaica part of the Caribbean Sea	274	Dec	1	14244	0	0	0	0	0
392	Jan Mayen part of the Norwegian Sea	259	Dec	3	235732	0	0	0	0	0
393	Jan Mayen part of the Greenland Sea	258	Dec	2	21004	0	0	0	0	0
394	Indonesian part of the Philippine Sea	233	Dec	1	148936	0	0	0	0	0
395	Indonesian part of the North Pacific Ocean	232	Dec	2	356299	0	0	0	0	0
396	Ile Europa part of the Mozambique Channel	209	Dec	2	148302	0	0	0	0	0
397	Guadeloupean part of the North Atlantic Ocean	164	Dec	2	76039	0	0	0	0	0
398	Greenlandic part of the Labrador Sea	159	Dec	3	328300	0	0	0	0	0
399	Ecuadorian (Galapagos) part of the North Pacific Ocean	110	Dec	2	433282	0	0	0	0	0
400	Comoran part of the Indian Ocean	82	Dec	2	83157	0	0	0	0	0
401	Colombian (Serrana) part of the Caribbean Sea	78	Dec	1	3883	0	0	0	0	0
402	Colombian (Quitasueno) part of the Caribbean Sea	77	Dec	1	2023	0	0	0	0	0
403	Cocos Islands part of the Indian Ocean	75	Dec	1	74350	0	0	0	0	0
404	Clipperton part of the North Pacific Ocean	74	Dec	1	173594	0	0	0	0	0
405	Christmas Island part of the Indian Ocean	73	Dec	1	69803	0	0	0	0	0
406	Chilean (San Felix and San Ambrosio islands) part of the South Pacific Ocean	67	Dec	1	279481	0	0	0	0	0
407	Brazilian (Trindade) part of the South Atlantic Ocean	41	Dec	2	192690	0	0	0	0	0
408	Bermudian part of the North Atlantic Ocean	37	Dec	1	57229	0	0	0	0	0
409	Beninese part of the Gulf of Guinea	36	Dec	1	34567	0	0	0	0	0
410	Bassas da India part of the Mozambique Channel	33	Dec	4	137707	0	0	0	0	0
411	Amsterdam Island & St. Paul Island part of the Indian Ocean	6	Dec	1	146997	0	0	0	0	0
	Totals (km2)				61679477	1.91837e+06	1.64157e+06	838054	290614	91618.7
	Percentage of total EEZs.					0.0311022	0.0266145	0.0135872	0.00471168	0.0014854

## Sheet: Table S2 (% of EEZ ALAN)
						Percentage of region affected by ALAN >Zm
Rank	EEZ Long Descriptor	EEZ ID	Month	N Tiles	N Pixels	> 1m	>10m	>20m	>30m	>40m
1	Iraqi part of the Persian Gulf	242	Apr	1	940	100	30.6	4.5	4.5	0.2
2	Overlapping claim Palestinian part of the Mediterranean Sea - Eastern Basin	413	Dec	1	600	99.8	99.8	99.8	68.8	34.2
3	French part of the North Sea	139	Oct	1	2372	98.6	97.8	3.6	0.1	0
4	Qatari part of the Persian Gulf	436	Jan	1	33786	94.1	94	37.4	3.7	0.2
5	Turkish part of the Sea of Marmara	530	Dec	1	14378	93	90.9	15.3	1.8	0.2
6	Bahraini part of the Persian Gulf	29	Nov	1	8885	83.2	82.1	30.3	3.9	1.7
7	Belgian part of the North Sea	34	Sep	1	4245	80.2	70.1	7.5	0	0
8	Saudi Arabian part of the Persian Gulf	468	Nov	2	37437	80.1	78.9	20.2	2.6	1.4
9	United Arab Emirates part of the Persian Gulf	534	Nov	1	53317	79.7	79.5	35.1	7.8	2.6
10	Overlapping claim Gibraltarian part of the Alboran Sea	378	Dec	1	148	79.1	78.4	68.9	41.2	2.7
11	United Arab Emirates part of the Gulf of Oman	533	Mar	1	4580	76.7	76.6	34.2	11	2.2
12	United States part of the The Coastal Waters of Southeast Alaska and British Columbia	555	Jan	1	7508	76.3	69.6	5.4	1.9	0.7
13	Kuwaiti part of the Persian Gulf	305	Feb	1	12993	74.9	61.3	12	2.7	1.6
14	Egyptian part of the Gulf of Suez	115	Dec	1	10692	70.5	70.5	59.4	24.3	2.4
15	Japanese part of the Seto Naikai or Inland Sea	265	Dec	1	16756	65.7	65.1	9	4.1	0.5
16	Spanish part of the Strait of Gibraltar	495	Nov	1	619	62.4	61.4	47.7	13.1	4.8
17	Overlapping claim: Iran / United Arab Emirates part of the Persian Gulf	402	Nov	1	5872	60	60	13	6.8	0.1
18	Moroccan part of the Strait of Gibraltar	342	Dec	1	810	59.9	59.1	46.8	30.9	2.2
19	Iranian part of the Persian Gulf	241	Dec	4	119714	59.8	57.4	20.7	3.3	0.3
20	Swedish part of the Kattegat	508	Feb	1	12334	59.8	30.5	1.1	0.1	0
21	Finnish part of the Gulf of Finland	131	Apr	2	19285	55.3	2.6	0.8	0.3	0.1
22	Estonian part of the Gulf of Finland	124	Mar	1	12793	54.6	3.8	0.9	0.3	0.1
23	Democratic Republic of the Congo part of the South Atlantic Ocean	99	Jun	2	13299	54.5	37.3	13.2	1.3	0
24	Indonesian part of the Singapore Strait	235	Jun	1	1416	53.3	41.7	5.4	1.5	0.7
25	Uruguayan part of the Rio de La Plata	556	Nov	1	16633	48.2	1.7	0.2	0.1	0.1
26	United Kingdom part of the Bristol Channel	535	Aug	1	8240	46.1	19	1.3	0.3	0
27	Omani part of the Persian Gulf	370	Jan	1	4974	42.1	42.1	10	3.5	0.7
28	Italian part of the Adriatic Sea	249	Dec	2	87988	40.4	39.4	13	4	0.9
29	Turkish part of the Aegean Sea	527	Dec	2	14112	36	36	32.8	9.2	2.1
30	German part of the Kattegat	147	Mar	2	899	35.4	14.5	3.8	2.1	0.8
31	Israeli part of the Mediterranean Sea - Eastern Basin	248	Dec	1	27731	34.4	34.4	34.4	18.2	16.1
32	Russian Exclusive economic Zone part of the Gulf of Finland	446	Aug	4	20515	31.4	3.2	1.1	0.5	0.2
33	Albanian part of the Ionian Sea	2	Jul	1	1447	31.3	30.4	29.4	17.2	13.4
34	Irish part of the Irish Sea and St. George's Channel	245	Feb	1	16291	31.3	27.8	3.1	0.7	0
35	Malaysian part of the Singapore Strait	318	Jun	1	1940	31.2	30.7	17.8	7.8	3
36	Congolese part of the South Atlantic Ocean	84	May	2	35023	31.1	29.6	6.1	0.5	0
37	South Korean part of the Japan Sea	487	Apr	2	222288	29.8	29.2	17.8	9	1
38	Tunisian part of the Tyrrhenian Sea	526	Nov	1	396	28.3	23.2	16.7	6.3	2.3
39	Italian part of the Ligurian Sea	251	Nov	1	17601	28	28	26.9	4.1	0.8
40	Trinidad and Tobago part of the Caribbean Sea	521	Sep	2	19303	27.8	20.3	2.1	0.5	0.2
41	Lebanese part of the Mediterranean Sea - Eastern Basin	308	Dec	1	21108	27.2	27.2	27.2	8.8	8.5
42	Omani part of the Gulf of Oman	369	Feb	2	60203	26.5	26.2	4.2	2.2	0.6
43	Cameroonian part of the Gulf of Guinea	49	Jun	1	14492	26.3	19.5	5.9	0.7	0.1
44	Norwegian part of the Skagerrak	366	Mar	2	28691	25.2	22.4	3.3	0.4	0.1
45	Egyptian part of the Gulf of Aqaba	114	Oct	1	1507	24.4	24.3	20.7	6.4	3.1
46	Polish part of the Baltic Sea	429	Jun	1	51752	24.1	14.3	1.1	0.2	0.1
47	Argentinean part of the Rio de La Plata	14	Nov	1	18990	23.6	0.1	0.1	0	0
48	Nigerian part of the Gulf of Guinea	356	Oct	1	190972	23	20.5	11.4	4.3	0.5
49	French part of the English Channel	135	Feb	4	56958	22.9	21.9	4.4	0.8	0.1
50	Danish part of the Kattegat	96	Feb	2	49232	22.8	14.7	1.6	0.6	0.2
51	Finnish part of the Gulf of Bothnia	130	May	4	145359	22.5	7.6	0.8	0.3	0.1
52	Dutch part of the North Sea	106	Jun	1	109119	20.8	17.5	5.1	1.1	0.9
53	Spanish part of the Balearic (Iberian Sea)	491	Feb	3	105444	20	20	17.9	4.4	0.7
54	Malaysian part of the Malacca Strait	317	Apr	2	72188	19.8	16.2	3.4	1.2	0.5
55	German part of the Baltic Sea	146	Jun	2	24383	19.7	12.5	1.3	0.2	0.1
56	Sint-Maarten part of the Caribbean Sea	475	Dec	1	451	19.5	19.3	19.3	0.4	0.2
57	Latvian part of the Gulf of Riga	307	Sep	1	13264	19.5	0.2	0	0	0
58	Chinese part of the Yellow Sea	72	Oct	3	342731	19	5.7	0.5	0.2	0.1
59	Jersey part of the English Channel	268	Jun	1	2459	18.5	18.5	9	5.4	1.8
60	Vietnamese part of the Gulf of Thailand	562	Dec	2	60041	18.3	18.2	10.7	2.2	1.3
61	Algerian part of the Mediterranean Sea - Western Basin	4	Dec	2	166920	18	18	16.2	5.3	0.2
62	Thailand part of the Gulf of Thailand	516	Dec	4	193725	17.4	17.2	12	4.5	0.8
63	United Kingdom part of the Irish Sea and St. George's Channel	539	Mar	1	59799	17.4	10.9	1.3	0.2	0
64	Saudi Arabian part of the Gulf of Aqaba	467	Dec	1	439	17.3	17.3	16.9	3	1.8
65	Equatorial Guinean part of the Gulf of Guinea	119	Dec	1	57846	17.1	16.8	6.8	2.1	0.7
66	Albanian part of the Adriatic Sea	1	Dec	2	22327	16.5	16.2	10.9	5.2	1.6
67	Taiwanese part of the Eastern China Sea	511	Nov	1	31379	15.5	15.5	7.2	5.5	1.1
68	Bruneian part of the South China Sea	46	Dec	1	44357	15.3	15.1	10	2.4	0.8
69	Moroccan part of the Alboran Sea	340	Mar	1	16192	14.4	14.4	11.5	2.1	0.2
70	United Kingdom part of the North Sea	541	Apr	4	489021	13.3	11.1	5.3	2.6	0.6
71	United Kingdom part of the English Channel	537	Mar	3	57422	13.1	8.9	1.4	0.4	0.1
72	Syrian part of the Mediterranean Sea - Eastern Basin	510	Dec	1	10732	12.9	12.9	12.9	0.2	0.2
73	Russian Exclusive economic Zone part of the Baltic Sea	440	Mar	2	18472	12.8	6.9	0.2	0.1	0
74	Swedish part of the Skagerrak	509	Feb	1	12655	12.4	6.2	0.9	0.4	0.1
75	Guadeloupean part of the Caribbean Sea	163	Sep	1	20779	12.3	12.3	10.3	2.8	1.9
76	French part of the Mediterranean Sea - Western Basin	137	Feb	1	105240	12.2	12.2	7.8	2.3	0.8
77	Chinese part of the Eastern China Sea	70	Sep	4	342463	12.2	1.7	0.4	0.2	0.1
78	Lithuanian part of the Baltic Sea	312	Apr	2	11012	12	1.2	0	0	0
79	Malaysian part of the South China Sea	319	Dec	2	439335	11.9	11.7	9.5	4.4	1
80	Spanish part of the Alboran Sea	490	Mar	1	31186	11.9	11.9	4.7	1.6	0.8
81	Saudi Arabian part of the Red Sea	469	Dec	4	214980	11.5	11.5	8.7	3.1	1.4
82	Algerian part of the Alboran Sea	3	Jan	1	8419	11.1	10.9	10.4	0.7	0.2
83	Italian part of the Tyrrhenian Sea	254	Dec	4	297085	11.1	11.1	9.9	2	0.4
84	Spanish part of the North Atlantic Ocean	494	Mar	2	137813	11.1	11	3.6	1.3	0.6
85	Saint-Martin part of the Caribbean Sea	457	Sep	1	847	10.9	10.7	8.6	0.7	0.2
86	Cuban part of the North Atlantic Ocean	92	Apr	3	65334	10.7	10.5	10	5.2	4.7
87	Tunisian part of the Mediterranean Sea - Eastern Basin	524	Dec	1	81024	10.4	10.1	6.8	1.7	0.2
88	Russian Exclusive economic Zone part of the Sea of Azov	451	Apr	1	19307	10.3	1.2	0.3	0.2	0
89	Italian part of the Ionian Sea	250	Feb	2	113665	9.8	9.8	8.4	1.5	0.3
90	Anguilla part of the Caribbean Sea	8	Dec	1	6144	9.7	9.7	9.3	3.8	2.2
91	Croatian part of the Adriatic Sea	88	Dec	1	78708	9.6	9.6	6.1	2	0.5
92	Chinese part of the South China Sea	71	Dec	5	518534	9.5	7	2	0.6	0.2
93	Malaysian part of the Gulf of Thailand	316	Jan	1	8298	9.1	8.6	3.6	1.7	0.1
94	Spanish part of the Bay of Biscay	492	Mar	1	100535	8.7	8.7	3	1.8	1.2
95	Thailand part of the Malacca Strait	517	Mar	2	42012	8.5	8.3	5.1	0.5	0.1
96	Sint-Eustatius part of the Caribbean Sea	474	Dec	1	1565	8.4	8.4	8.3	2.6	2.6
97	Norwegian part of the North Sea	364	Apr	2	245072	8.4	8.4	3.6	1.7	0.6
98	Egyptian part of the Mediterranean Sea - Eastern Basin	116	Feb	2	210926	8.4	8	4.9	1.5	1.3
99	Antigua and Barbuda part of the Caribbean Sea	12	Oct	1	11148	8.3	8.3	7.6	3.5	1.3
100	Vietnamese part of the South China Sea	563	Dec	5	785201	8.3	8	2.7	1.4	0.5
101	Montenegrin Exclusive economic Zone part of the Adriatic Sea	338	Mar	1	7446	8.2	8.2	3.9	0.8	0.4
102	Djiboutian part of the Red Sea	101	Sep	1	298	8.1	8.1	5.7	1.3	0
103	French part of the Tyrrhenian Sea	140	Nov	2	8635	7.9	7.9	5.3	1.1	0.4
104	Saint Kitts and Nevis part of the Caribbean Sea	460	Sep	1	9412	7.7	7.7	7.6	2	1.9
105	British Virgin Islands part of the Caribbean Sea	44	Oct	1	7632	7.7	7.7	7.6	1.4	1.1
106	Greek part of the Aegean Sea	152	Jan	2	244958	7.7	7.7	6	2.1	0.8
107	South Korean part of the Yellow Sea	488	Oct	1	162135	7.6	5.5	1	0.4	0.1
108	Turkish part of the Black Sea	528	Jan	3	246463	7.5	7.5	2.3	1.2	0
109	Thailand part of the Andaman or Burma Sea	515	Dec	2	82494	7.5	7.5	7.4	0.7	0.6
110	Djiboutian part of the Gulf of Aden	100	Aug	1	5583	7.4	7.4	2.1	0.4	0.1
111	Martinican part of the Caribbean Sea	326	Apr	2	20582	7.4	7.4	6.6	1.3	1
112	Saint Lucia part of the Caribbean Sea	461	Apr	1	14363	7.3	7.3	6.9	2.8	2.4
113	Portuguese part of the North Atlantic Ocean	432	Mar	3	359864	7.1	7	2.8	0.7	0.5
114	Joint regime area Japan / Korea part of the Eastern China Sea	284	Apr	2	98722	6.9	6.9	6.6	2.6	0.3
115	Malaysian part of the Celebes Sea	315	Jun	1	13004	6.8	6.5	4.7	0.7	0.5
116	Curacaoan part of the Caribbean Sea	93	Feb	1	25795	6.7	6.7	6.4	2.5	1.7
117	East Timorian part of the Banda Sea	107	Dec	1	5076	6.7	6.7	6.7	2.2	2.2
118	Swedish part of the Gulf of Bothnia	507	Sep	3	118831	6.7	2.7	0.2	0.1	0
119	Angolan part of the South Atlantic Ocean	7	Feb	3	447840	6.6	6.3	1.4	0.2	0.1
120	Tunisian part of the Mediterranean Sea - Western Basin	525	Dec	2	38679	6.6	6.5	6	1.5	0
121	Swedish part of the Baltic Sea	506	Mar	2	173172	6.6	4.6	0.5	0.2	0.1
122	Japanese part of the Japan Sea	261	Apr	5	708092	6.5	6.5	4.6	2.1	0.3
123	Taiwanese part of the South China Sea	513	Jan	3	320230	6	5.8	2.9	1.1	0.3
124	Libyan part of the Mediterranean Sea - Eastern Basin	311	Jan	2	465651	6	6	6	2.2	1.4
125	Indonesian part of the Malacca Strait	230	May	2	92135	6	5.5	2.9	1.2	0.4
126	United Kingdom part of the Inner Seas off the West Coast of Scotland	538	Mar	1	68770	6	5	0.9	0.3	0
127	Venezuelan part of the Caribbean Sea	560	Apr	4	491973	5.9	4.7	2.4	1	0.2
128	Spanish part of the Mediterranean Sea - Western Basin	493	Mar	3	206068	5.8	5.8	5.4	1.7	0.2
129	Joint regime area Peru / Ecuador part of the South Pacific Ocean	287	Nov	1	13097	5.8	5.8	3	2.9	0.5
130	Joint regime area Argentina / Uruguay part of the Rio de La Plata	270	Dec	1	278	5.8	1.4	0.4	0.4	0.4
131	Colombian (Serranilla) part of the Caribbean Sea	79	Dec	2	2588	5.7	5.2	2.1	0.7	0.2
132	Maltese part of the Mediterranean Sea - Eastern Basin	324	Feb	1	62875	5.7	5.7	5.7	1.8	1.5
133	Trinidad and Tobago part of the North Atlantic Ocean	522	Sep	4	58219	5.6	4	0.2	0	0
134	Danish part of the North Sea	97	Mar	1	93145	5.5	4.6	2.2	0.5	0.1
135	United Kingdom part of the Norwegian Sea	542	Jun	2	106382	5.4	5.4	3.3	0.5	0.1
136	Russian Exclusive economic Zone part of the Black Sea	443	Nov	1	72007	5.3	5.3	2	1	0
137	Greek part of the Ionian Sea	153	Dec	2	111248	5.2	5.2	4.6	1.3	0.4
138	German part of the North Sea	148	Jul	1	73589	5.2	1.1	0.1	0	0
139	Gabonese part of the South Atlantic Ocean	143	Jun	2	191538	5.2	5.2	1.5	0.2	0
140	Greek part of the Adriatic Sea	151	Dec	2	2507	5.1	5.1	4.1	0.5	0.2
141	Honduran part of the North Pacific Ocean	203	Jan	1	1458	5.1	5.1	2.1	0.8	0.4
142	Canadian part of the The Coastal Waters of Southeast Alaska and British Columbia	62	Oct	3	136008	5	3.1	0.5	0.2	0.1
143	Puerto Rican part of the North Atlantic Ocean	435	Oct	2	57184	5	5	5	0.8	0.8
144	Georgian part of the Black Sea	145	Dec	2	31048	4.7	4.7	1.4	0.8	0
145	Virgin Islander part of the North Atlantic Ocean	565	Dec	1	1457	4.7	4.5	2.8	1.4	0.3
146	Barbados part of the Caribbean Sea	31	Mar	2	13737	4.5	4.5	4.2	0.8	0.5
147	French part of the Bay of Biscay	133	Feb	1	156198	4.5	3.1	0.6	0.2	0
148	Saint-Barthelemy part of the North Atlantic Ocean	456	Sep	1	728	4.3	4.3	3.2	0.7	0.3
149	Virgin Islander part of the Caribbean Sea	564	Feb	1	37692	4.2	4.2	4	1.4	0.9
150	Moroccan part of the North Atlantic Ocean	341	Feb	4	334303	4.2	4.2	2.4	0.7	0.1
151	Cypriote part of the Mediterranean Sea - Eastern Basin	94	Sep	2	123520	4.1	4.1	4	1	0.9
152	Indonesian part of the Java Sea	228	Jul	2	618555	4.1	4	1.5	0.8	0.4
153	Turkish part of the Mediterranean Sea - Eastern Basin	529	Jan	2	68960	4	4	4	0.8	0.2
154	Irish part of the Inner Seas off the West Coast of Scotland	244	Mar	1	10047	4	3.2	1.2	0.7	0.1
155	Romanian Exclusive economic Zone part of the Black Sea	438	Apr	2	41335	4	3.8	0.5	0	0
156	Mexican part of the Gulf of Mexico	332	Dec	3	887462	3.6	3.4	1.9	1.1	0.1
157	Cambodian part of the Gulf of Thailand	48	Jul	2	50378	3.6	3.5	2	0.3	0.1
158	Canadian part of the Bay of Fundy	52	Dec	1	20408	3.5	1.1	0.3	0.1	0
159	Guatemalan part of the Caribbean Sea	167	Dec	1	810	3.5	3.3	0.7	0	0
160	Italian part of the Mediterranean Sea - Eastern Basin	252	Mar	1	88449	3.1	3.1	3.1	0.3	0.1
161	Saint-Barthelemy part of the Caribbean Sea	455	Oct	1	2987	3	3	2.9	0.8	0.8
162	Indonesian part of the Bali Sea	218	Oct	1	36391	2.9	2.9	2.3	0.7	0.3
163	Aruban part of the Caribbean Sea	17	Aug	2	31756	2.9	2.9	2.8	1.1	0.8
164	Italian part of the Mediterranean Sea - Western Basin	253	Mar	3	119873	2.8	2.8	2.7	0.8	0.1
165	Taiwanese part of the Philippine Sea	512	Jan	1	56841	2.8	2.8	2.4	0.4	0
166	East Timorian part of the Savu Sea	108	Dec	1	217	2.8	2.8	2.8	1.8	1.8
167	Singaporean part of the Singapore Strait	473	Jun	1	946	2.7	2.1	1.2	0.5	0.2
168	Egyptian part of the Red Sea	117	Jan	1	67243	2.7	2.7	2.4	0.6	0.2
169	Ivory Coast part of the Gulf of Guinea	255	Oct	1	69673	2.6	2.6	1	0.4	0.1
170	Spanish (Canary Islands) part of the North Atlantic Ocean	489	Oct	3	447491	2.5	2.5	2.4	0.7	0.6
171	Japanese part of the Sea of Okhotsk	264	Oct	1	47283	2.5	2.5	1.2	0.5	0.2
172	Latvian part of the Baltic Sea	306	Apr	2	36898	2.4	0.6	0	0	0
173	Puerto Rican part of the Caribbean Sea	434	May	1	107330	2.4	2.4	2.1	0.2	0.1
174	Japanese part of the Eastern China Sea	260	Dec	4	314124	2.4	2.3	1.6	0.7	0.5
175	Gabonese part of the Gulf of Guinea	142	Apr	2	23808	2.3	2	0.4	0.2	0
176	Overlapping claim Liancourt Rocks: Japan / South Korea part of the Japan Sea	385	Apr	1	1305	2.2	2.2	1.1	0.3	0.2
177	Danish part of the Skagerrak	98	Mar	2	19477	2.2	1.7	0.1	0	0
178	Joint regime area Japan / Korea part of the Japan Sea	285	Apr	1	1084	2.1	2	1.8	0.6	0.1
179	Ghanaian part of the Gulf of Guinea	149	Aug	2	196728	2.1	2.1	0.8	0.2	0
180	Australian part of the Bass Strait	21	Jun	2	152487	2	1.9	0.6	0.2	0
181	Guernsey part of the English Channel	169	Oct	2	8971	2	2	0.5	0.2	0
182	Danish part of the Baltic Sea	95	Feb	1	29044	2	1.3	0.4	0.1	0
183	Bulgarian part of the Black Sea	47	Nov	2	48530	2	1.9	0.2	0	0
184	Overlapping claim Ukrainian part of the Black Sea	398	Feb	2	164797	2	1.9	0.5	0.3	0.1
185	Colombian (Bajo Nuevo) part of the Caribbean Sea	76	Dec	1	1268	2	1.8	1.1	0.5	0
186	Indonesian part of the Makassar Strait	229	May	3	210545	1.9	1.4	0.5	0.1	0
187	Mexican part of the Caribbean Sea	330	Jan	2	99133	1.9	1.8	1.5	0.5	0.3
188	Ecuadorian part of the South Pacific Ocean	113	Apr	2	176071	1.9	1.8	0.6	0.3	0.2
189	Bonaire part of the Caribbean Sea	38	Feb	1	12884	1.8	1.8	1.6	0.6	0.5
190	Grenadian part of the Caribbean Sea	162	Sep	1	25562	1.8	1.8	1	0.4	0.2
191	South Korean part of the Eastern China Sea	486	Feb	1	64905	1.8	1.5	0.8	0.5	0.2
192	Overlapping claim Ukrainian part of the Sea of Azov	399	Dec	1	31561	1.7	0.4	0.1	0	0
193	Philippines part of the Sulu Sea	427	Jan	4	353572	1.6	1.6	1	0.8	0.1
194	French part of the Ligurian Sea	136	Jun	1	4432	1.6	1.5	1.5	0.6	0.3
195	Estonian part of the Gulf of Riga	125	Mar	1	19211	1.5	0.3	0.1	0.1	0
196	Dominican part of the Caribbean Sea	102	Dec	1	15965	1.5	1.5	1.4	0.5	0.4
197	Colombian part of the Caribbean Sea	80	Oct	3	438249	1.5	1.4	0.7	0.2	0.1
198	Senegalese part of the North Atlantic Ocean	470	Dec	1	134361	1.4	1.4	0.2	0.1	0
199	Russian Exclusive economic Zone part of the White Sea	453	Sep	2	224267	1.4	0.1	0	0	0
200	Ecuadorian part of the North Pacific Ocean	112	May	2	73584	1.3	1.3	0.4	0.1	0.1
201	Yemeni part of the Gulf of Aden	569	Aug	2	132024	1.3	0.8	0.1	0	0
202	Malaysian part of the Sulu Sea	320	Sep	1	14421	1.3	1.2	0.3	0.1	0
203	Sri Lankan part of the Laccadive Sea	498	Jul	2	106517	1.2	1.2	0.6	0.3	0.1
204	French part of the Celtic Sea	134	Feb	1	96772	1.1	0.9	0.3	0.1	0
205	Indonesian part of the South China Sea	236	May	3	620117	1.1	0.8	0.5	0.1	0.1
206	Belizean part of the Caribbean Sea	35	Dec	1	35819	1	0.8	0.2	0	0
207	Cayman Islands part of the Caribbean Sea	65	Jun	4	131808	1	1	0.9	0.4	0.3
208	East Timorian part of the Timor Sea	109	Dec	2	67947	1	1	1	0.3	0.3
209	South African part of the South Atlantic Ocean	485	Jan	2	494955	0.9	0.9	0.2	0	0
210	Indian part of the Bay of Bengal	214	Aug	4	642177	0.9	0.8	0.4	0.1	0
211	Russian Exclusive economic Zone part of the Japan Sea	447	Nov	4	479946	0.9	0.8	0.2	0.1	0
212	Gambian part of the North Atlantic Ocean	144	Dec	1	15754	0.9	0.3	0	0	0
213	Overlapping claim Mayotte: France / Comoros part of the Mozambique Channel	388	Oct	1	67773	0.9	0.9	0.7	0.2	0
214	Jamaican part of the Caribbean Sea	257	Mar	2	285533	0.8	0.8	0.7	0.2	0.1
215	Philippines part of the South China Sea	426	Jul	5	659260	0.8	0.7	0.5	0.2	0.2
216	Overlapping claim: Venezuela / Aruba / Dominican Republic part of the Caribbean Sea	407	Dec	2	256	0.8	0.8	0.8	0.8	0.8
217	Iranian part of the Gulf of Oman	240	Jan	2	59562	0.8	0.7	0.1	0.1	0
218	Yemeni part of the Red Sea	570	Oct	1	34919	0.7	0.7	0.2	0.2	0
219	Reunion part of the Indian Ocean	437	Dec	2	371893	0.7	0.7	0.7	0.3	0.2
220	Saint-Pierre and Miquelon part of the Gulf of St. Lawrence	458	Dec	1	6195	0.7	0.7	0.3	0.1	0.1
221	Bahamas part of the North Atlantic Ocean	28	May	3	784644	0.7	0.6	0.4	0.1	0.1
222	Omani part of the Arabian Sea	368	Oct	4	579431	0.7	0.6	0.2	0.1	0
223	Pakistani part of the Arabian Sea	409	Dec	1	262513	0.7	0.6	0.1	0	0
224	Pakistani part of the Gulf of Oman	410	Dec	1	154	0.6	0.6	0	0	0
225	Joint regime area Sweden / Norway part of the Skagerrak	290	Oct	1	165	0.6	0.6	0	0	0
226	Indian part of the Laccadive Sea	215	Sep	2	435975	0.6	0.6	0.1	0	0
227	Turks and Caicos part of the North Atlantic Ocean	531	May	2	105540	0.6	0.6	0.5	0.2	0.1
228	Philippines part of the Celebes Sea	424	Aug	2	199530	0.6	0.6	0.6	0.2	0.1
229	Myanmar part of the Andaman or Burma Sea	345	Jan	2	309555	0.6	0.6	0.4	0.1	0.1
230	United Kingdom part of the Celtic Sea	536	Mar	2	116472	0.5	0.5	0.2	0	0
231	Saint Vincent and the Grenadines part of the Caribbean Sea	462	Sep	1	36136	0.5	0.5	0.5	0.2	0
232	Portuguese (Madeira) part of the North Atlantic Ocean	431	Feb	3	595406	0.5	0.5	0.5	0.2	0.1
233	Indonesian part of the Andaman or Burma Sea	216	Nov	1	35814	0.5	0.5	0.4	0.1	0
234	Honduran part of the Caribbean Sea	202	Nov	1	232906	0.5	0.5	0.2	0.1	0.1
235	Tanzanian part of the Indian Ocean	514	Jan	4	266332	0.5	0.5	0.3	0.1	0
236	Bangladeshi part of the Bay of Bengal	30	Dec	4	132158	0.4	0	0	0	0
237	Dominican Republic part of the Caribbean Sea	104	Dec	2	178130	0.4	0.4	0.4	0	0
238	Panamanian part of the North Pacific Ocean	416	Mar	2	202699	0.4	0.4	0.1	0.1	0
239	Togolese part of the Gulf of Guinea	518	Aug	1	13010	0.4	0.4	0.1	0.1	0
240	United Kingdom part of the North Atlantic Ocean	540	Jun	5	517165	0.4	0.4	0.2	0.1	0
241	Iranian part of the Arabian Sea	239	Dec	1	5737	0.4	0.4	0.1	0	0
242	Panamanian part of the Caribbean Sea	415	Jul	4	151305	0.4	0.4	0.2	0.1	0
243	Costa Rican part of the Caribbean Sea	86	Nov	2	37723	0.3	0.3	0.1	0.1	0
244	Myanmar part of the Bay of Bengal	346	Mar	2	251654	0.3	0.3	0.2	0	0
245	Mauritanian part of the North Atlantic Ocean	328	Dec	2	191628	0.3	0.3	0.1	0	0
246	Greek part of the Mediterranean Sea - Eastern Basin	154	Feb	3	284370	0.3	0.3	0.3	0.1	0
247	French Guiana part of the North Atlantic Ocean	132	Dec	2	142082	0.3	0	0	0	0
248	United States (Alaska) part of the Chukchi Sea	546	Sep	1	241422	0.3	0.1	0	0	0
249	Mexican part of the Gulf of California	331	Feb	3	217414	0.3	0.3	0.1	0.1	0
250	Irish part of the North Atlantic Ocean	246	Feb	3	541308	0.3	0.2	0.1	0	0
251	Sudanese part of the Red Sea	500	Jul	2	65747	0.3	0.2	0	0	0
252	Indonesian part of the Ceram Sea	222	Apr	2	172521	0.3	0.2	0	0	0
253	Saba part of the Caribbean Sea	454	Sep	1	8418	0.3	0.3	0.3	0.1	0
254	Cuban part of the Caribbean Sea	90	Dec	4	246883	0.3	0.3	0.2	0	0
255	Australian part of the Timor Sea	27	Oct	4	267555	0.3	0.2	0	0	0
256	United States (Alaska) part of the The Coastal Waters of Southeast Alaska and British Columbia	549	Mar	1	47381	0.2	0.2	0.1	0	0
257	Indonesian part of the Celebes Sea	221	Jun	2	273770	0.2	0.1	0	0	0
258	Indonesian part of the South Pacific Ocean	237	Oct	2	250260	0.2	0.2	0.2	0.1	0
259	Overlapping claim Senkaku Islands: Japan / China / Taiwan part of the Eastern China Sea	394	Feb	1	84785	0.2	0.2	0.2	0	0
260	Guyanese part of the North Atlantic Ocean	172	Dec	2	145353	0.2	0	0	0	0
261	Overlapping claim Western Saharan part of the North Atlantic Ocean	400	Jun	2	311038	0.2	0.2	0	0	0
262	Indonesian part of the Gulf of Boni	224	Feb	1	32701	0.2	0.2	0.1	0.1	0
263	Mauritian part of the Indian Ocean	329	Sep	2	725453	0.2	0.2	0.2	0.1	0.1
264	Oecussi Ambeno part of the Savu Sea	367	Dec	1	1035	0.2	0.2	0.2	0	0
265	Equatorial Guinean part of the North Atlantic Ocean	120	Nov	1	10870	0.2	0.2	0	0	0
266	Kenyan part of the Indian Ocean	297	Jan	2	120216	0.2	0.2	0.1	0	0
267	Dominican Republic part of the North Atlantic Ocean	105	Dec	4	218710	0.2	0.2	0.1	0	0
268	Guinean part of the North Atlantic Ocean	171	Dec	2	109357	0.2	0.1	0	0	0
269	Faeroe part of the North Atlantic Ocean	126	May	2	319975	0.2	0.2	0.1	0.1	0
270	Overlapping claim Kuril Islands: Japan / Russia part of the Sea of Okhotsk	384	Dec	1	131443	0.2	0.2	0.1	0.1	0
271	Joint regime area Argentina / Uruguay part of the South Atlantic Ocean	271	Dec	1	51444	0.2	0	0	0	0
272	Portuguese (Azores) part of the North Atlantic Ocean	430	Jul	2	911636	0.2	0.2	0.1	0	0
273	Indonesian part of the Timor Sea	238	Jul	3	130419	0.2	0.2	0.2	0	0
274	Haitian part of the Caribbean Sea	173	Nov	1	96520	0.2	0.2	0.1	0	0
275	Indonesian part of the Bay of Bengal	220	Dec	1	3445	0.1	0.1	0	0	0
276	Maldives part of the Laccadive Sea	323	Oct	1	364238	0.1	0.1	0.1	0	0
277	Joint regime area Nigeria / Sao Tome and Principe part of the Gulf of Guinea	286	Aug	1	34535	0.1	0.1	0.1	0	0
278	New Caledonian part of the Coral Sea	350	Apr	4	1192426	0.1	0.1	0.1	0.1	0
279	Sri Lankan part of the Bay of Bengal	496	May	3	261742	0.1	0.1	0.1	0	0
280	Indonesian part of the Banda Sea	219	Apr	2	765011	0.1	0.1	0.1	0.1	0.1
281	Vanuatu part of the Coral Sea	558	Jul	2	353116	0.1	0.1	0.1	0	0
282	Haitian part of the North Atlantic Ocean	174	Feb	2	13595	0.1	0.1	0.1	0.1	0
283	Dominican part of the North Atlantic Ocean	103	Jun	2	11410	0.1	0.1	0.1	0	0
284	Joint regime area Spain / France part of the Bay of Biscay	289	Dec	1	900	0.1	0.1	0	0	0
285	North Korean part of the Yellow Sea	360	Dec	1	28952	0.1	0	0	0	0
286	Sierra Leonian part of the North Atlantic Ocean	472	Oct	1	173414	0.1	0.1	0	0	0
287	Canadian part of the Labrador Sea	58	Oct	4	1099291	0.1	0.1	0	0	0
288	Indonesian part of the Molukka Sea	231	Jul	2	239940	0.1	0.1	0.1	0	0
289	Martinican part of the North Atlantic Ocean	327	Dec	2	23633	0.1	0.1	0.1	0.1	0
290	Joint regime area Colombia / Dominican Republic part of the Caribbean Sea	273	Dec	1	4125	0.1	0.1	0.1	0	0
291	Surinamese part of the North Atlantic Ocean	501	Dec	1	142427	0.1	0	0	0	0
292	Icelandic part of the Greenland Sea	206	Sep	2	455910	0.1	0.1	0	0	0
293	Anguilla part of the North Atlantic Ocean	9	Apr	2	95820	0.1	0.1	0.1	0	0
294	Montserrat part of the Caribbean Sea	339	Dec	1	6309	0.1	0.1	0.1	0	0
295	Indonesian part of the Savu Sea	234	Feb	3	106015	0.1	0.1	0	0	0
296	American Samoa part of the South Pacific Ocean	5	Apr	2	464342	0.1	0.1	0.1	0	0
297	Uruguayan part of the South Atlantic Ocean	557	Nov	1	137181	0.1	0	0	0	0
298	Overlapping claim Mayotte: France / Comoros part of the Indian Ocean	387	Dec	1	1461	0.1	0	0	0	0
299	Finnish part of the Baltic Sea	129	Aug	2	19501	0.1	0.1	0	0	0
300	Ghanaian part of the North Atlantic Ocean	150	Dec	2	46917	0.1	0.1	0	0	0
301	Samoan part of the South Pacific Ocean	463	Aug	1	143937	0.1	0.1	0	0	0
302	Barbados part of the North Atlantic Ocean	32	Jul	1	191695	0.1	0.1	0	0	0
303	Antigua and Barbuda part of the North Atlantic Ocean	13	Aug	3	113120	0.1	0	0	0	0
304	Costa Rican part of the North Pacific Ocean	87	Dec	3	610352	0	0	0	0	0
305	Australian part of the Arafura Sea	20	Mar	3	650832	0	0	0	0	0
306	Indonesian part of the Halmahera Sea	226	Feb	4	76724	0	0	0	0	0
307	Nauruan part of the South Pacific Ocean	349	Dec	1	199934	0	0	0	0	0
308	Venezuelan part of the North Atlantic Ocean	561	Nov	3	28064	0	0	0	0	0
309	Sri Lankan part of the Indian Ocean	497	Jun	2	206718	0	0	0	0	0
310	Indonesian part of the Arafura Sea	217	Sep	4	475640	0	0	0	0	0
311	Irish part of the Celtic Sea	243	Feb	3	111040	0	0	0	0	0
312	Solomon Islands part of the Solomon Sea	478	Sep	4	294287	0	0	0	0	0
313	British Virgin Islands part of the North Atlantic Ocean	45	Dec	2	82488	0	0	0	0	0
314	Indonesian part of the Flores Sea	223	Feb	2	107189	0	0	0	0	0
315	Canadian part of the North Pacific Ocean	61	Oct	3	531371	0	0	0	0	0
316	Overlapping claim: Sudan / Egypt part of the Red Sea	405	Dec	1	20415	0	0	0	0	0
317	Namibian part of the South Atlantic Ocean	347	Apr	3	612668	0	0	0	0	0
318	Comoran part of the Mozambique Channel	83	Jun	1	93523	0	0	0	0	0
319	Overlapping claim: Puerto Rico / Dominican Republic part of the North Atlantic Ocean	404	Dec	2	18635	0	0	0	0	0
320	North Korean part of the Japan Sea	359	Dec	4	120967	0	0	0	0	0
321	Cuban part of the Gulf of Mexico	91	Apr	1	93763	0	0	0	0	0
322	French part of the North Atlantic Ocean	138	Mar	1	83088	0	0	0	0	0
323	Estonian part of the Baltic Sea	123	Oct	1	32875	0	0	0	0	0
324	Madagascan part of the Mozambique Channel	314	Mar	2	428648	0	0	0	0	0
325	Sao Tome and Principe part of the Gulf of Guinea	464	Jan	2	99180	0	0	0	0	0
326	Canadian part of the Davis Strait	54	Jun	3	989397	0	0	0	0	0
327	Indonesian part of the Gulf of Tomini	225	Dec	2	57081	0	0	0	0	0
328	Papua New Guinean part of the Arafura Sea	417	Nov	3	20302	0	0	0	0	0
329	Vanuatu part of the South Pacific Ocean	559	Oct	2	137687	0	0	0	0	0
330	Cape Verdean part of the North Atlantic Ocean	64	Dec	1	14437	0	0	0	0	0
331	Somali part of the Gulf of Aden	481	Nov	2	132232	0	0	0	0	0
332	Ecuadorian (Galapagos) part of the South Pacific Ocean	111	Mar	4	504905	0	0	0	0	0
333	El Salvador part of the North Pacific Ocean	118	Dec	2	101637	0	0	0	0	0
334	Indian (Andaman and Nicobar Islands) part of the Bay of Bengal	211	Sep	4	452489	0	0	0	0	0
335	Indian (Andaman and Nicobar Islands) part of the Indian Ocean	212	Nov	1	48801	0	0	0	0	0
336	Overlapping claim Kuril Islands: Japan / Russia part of the North Pacific Ocean	383	Dec	2	191470	0	0	0	0	0
337	Eritrean part of the Red Sea	122	Dec	2	85399	0	0	0	0	0
338	Joint regime area United Kingdom / Denmark (Faeroe Islands) part of the North Atlantic Ocean	291	Nov	3	14039	0	0	0	0	0
339	Icelandic part of the Norwegian Sea	208	Sep	2	344186	0	0	0	0	0
340	Indian (Andaman and Nicobar Islands) part of the Andaman or Burma Sea	210	Oct	2	235947	0	0	0	0	0
341	Colombian part of the North Pacific Ocean	81	Nov	2	361340	0	0	0	0	0
342	Papua New Guinean part of the Bismarck Sea	418	May	2	369384	0	0	0	0	0
343	Maldives part of the Indian Ocean	322	Dec	1	61961	0	0	0	0	0
344	Faeroe part of the Norwegian Sea	127	May	1	294863	0	0	0	0	0
345	Nicaraguan part of the Caribbean Sea	354	Dec	2	157531	0	0	0	0	0
346	Papua New Guinean part of the Solomon Sea	421	May	4	534169	0	0	0	0	0
347	Joint regime area Senegal / Guinea Bissau part of the North Atlantic Ocean	288	Dec	2	35789	0	0	0	0	0
348	Tongan part of the South Pacific Ocean	520	Dec	1	358210	0	0	0	0	0
349	Palau part of the Philippine Sea	412	Sep	2	307300	0	0	0	0	0
350	Guinea Bissau part of the North Atlantic Ocean	170	Oct	2	114523	0	0	0	0	0
351	Liberian part of the North Atlantic Ocean	310	Dec	2	273061	0	0	0	0	0
352	Palau part of the North Pacific Ocean	411	Dec	2	317301	0	0	0	0	0
353	Ivory Coast part of the North Atlantic Ocean	256	Dec	1	107817	0	0	0	0	0
354	Guatemalan part of the North Pacific Ocean	168	Dec	1	116796	0	0	0	0	0
355	Equatorial Guinean part of the South Atlantic Ocean	121	Jul	1	257659	0	0	0	0	0
356	Yemeni part of the Arabian Sea	568	Dec	2	412715	0	0	0	0	0
357	United States part of the Bay of Fundy	551	Dec	1	151	0	0	0	0	0
358	Tokelau part of the South Pacific Ocean	519	Dec	2	38018	0	0	0	0	0
359	Somali part of the Indian Ocean	482	Dec	4	688096	0	0	0	0	0
360	Somali part of the Arabian Sea	480	Dec	2	39686	0	0	0	0	0
361	Solomon Islands part of the Coral Sea	477	Dec	3	456712	0	0	0	0	0
362	Sao Tome and Principe part of the South Atlantic Ocean	466	Dec	1	23073	0	0	0	0	0
363	Sao Tome and Principe part of the North Atlantic Ocean	465	Dec	1	10403	0	0	0	0	0
364	Saint-Pierre and Miquelon part of the North Atlantic Ocean	459	Dec	1	8846	0	0	0	0	0
365	Protected Zone established under the Torres Strait Treaty part of the Coral Sea	433	Dec	1	2745	0	0	0	0	0
366	Overlapping claim: Trinidad and Tobago / Venezuela / Guyana part of the North Atlantic Ocean	406	Dec	1	1864	0	0	0	0	0
367	Overlapping claim: Kenya / Somalia part of the Indian Ocean	403	Dec	1	51052	0	0	0	0	0
368	Overlapping claim: Canada / USA part of the Beaufort Sea	401	Dec	1	584	0	0	0	0	0
369	Overlapping claim South China Sea part of the South China Sea	395	Dec	3	381216	0	0	0	0	0
370	Overlapping claim Navassa Island: USA / Haiti / Jamaica part of the Caribbean Sea	390	Dec	1	12989	0	0	0	0	0
371	Overlapping claim Ile Tromelin: Reunion / Madagascar / Mauritus part of the Indian Ocean	382	Dec	1	307213	0	0	0	0	0
372	Overlapping claim Glorioso Islands: France / Madagascar part of the Mozambique Channel	381	Dec	1	15882	0	0	0	0	0
373	Overlapping claim Glorioso Islands: France / Madagascar part of the Indian Ocean	380	Dec	1	24817	0	0	0	0	0
374	Overlapping claim Falkland / Malvinas Islands: UK / Argentina part of the South Atlantic Ocean	377	Dec	2	219973	0	0	0	0	0
375	Norfolk Island part of the South Pacific Ocean	358	Dec	1	295425	0	0	0	0	0
376	Niue part of the South Pacific Ocean	357	Dec	2	218209	0	0	0	0	0
377	Nicaraguan part of the North Pacific Ocean	355	Dec	2	67210	0	0	0	0	0
378	New Caledonian part of the South Pacific Ocean	351	Dec	1	222732	0	0	0	0	0
379	Micronesian part of the South Pacific Ocean	336	Dec	1	63680	0	0	0	0	0
380	Micronesian part of the Philippine Sea	335	Dec	1	33030	0	0	0	0	0
381	Maldives part of the Arabian Sea	321	Dec	1	270360	0	0	0	0	0
382	Kiribati (Line Islands) part of the South Pacific Ocean	302	Dec	2	332587	0	0	0	0	0
383	Kerguelen part of the Indian Ocean	298	Dec	2	655241	0	0	0	0	0
384	Juan de Nova part of the Mozambique Channel	296	Dec	1	67900	0	0	0	0	0
385	Joint regime area United States / Russia part of the North Pacific Ocean	294	Dec	1	214	0	0	0	0	0
386	Joint regime area Iceland / Norway (Jan Mayen) part of the Norwegian Sea	282	Dec	2	5920	0	0	0	0	0
387	Joint regime area Iceland / Norway (Jan Mayen) part of the Greenland Sea	281	Dec	2	1344	0	0	0	0	0
388	Joint regime area Iceland / Denmark (Faeroe Islands) part of the North Atlantic Ocean	280	Dec	1	1184	0	0	0	0	0
389	Joint regime area Ecuador / Colombia part of the North Pacific Ocean	277	Dec	2	10652	0	0	0	0	0
390	Joint regime area Costa Rica / Ecuador (Galapagos) part of the North Pacific Ocean	275	Dec	2	4708	0	0	0	0	0
391	Joint regime area Colombia / Jamaica part of the Caribbean Sea	274	Dec	1	14244	0	0	0	0	0
392	Jan Mayen part of the Norwegian Sea	259	Dec	3	235732	0	0	0	0	0
393	Jan Mayen part of the Greenland Sea	258	Dec	2	21004	0	0	0	0	0
394	Indonesian part of the Philippine Sea	233	Dec	1	148936	0	0	0	0	0
395	Indonesian part of the North Pacific Ocean	232	Dec	2	356299	0	0	0	0	0
396	Ile Europa part of the Mozambique Channel	209	Dec	2	148302	0	0	0	0	0
397	Guadeloupean part of the North Atlantic Ocean	164	Dec	2	76039	0	0	0	0	0
398	Greenlandic part of the Labrador Sea	159	Dec	3	328300	0	0	0	0	0
399	Ecuadorian (Galapagos) part of the North Pacific Ocean	110	Dec	2	433282	0	0	0	0	0
400	Comoran part of the Indian Ocean	82	Dec	2	83157	0	0	0	0	0
401	Colombian (Serrana) part of the Caribbean Sea	78	Dec	1	3883	0	0	0	0	0
402	Colombian (Quitasueno) part of the Caribbean Sea	77	Dec	1	2023	0	0	0	0	0
403	Cocos Islands part of the Indian Ocean	75	Dec	1	74350	0	0	0	0	0
404	Clipperton part of the North Pacific Ocean	74	Dec	1	173594	0	0	0	0	0
405	Christmas Island part of the Indian Ocean	73	Dec	1	69803	0	0	0	0	0
406	Chilean (San Felix and San Ambrosio islands) part of the South Pacific Ocean	67	Dec	1	279481	0	0	0	0	0
407	Brazilian (Trindade) part of the South Atlantic Ocean	41	Dec	2	192690	0	0	0	0	0
408	Bermudian part of the North Atlantic Ocean	37	Dec	1	57229	0	0	0	0	0
409	Beninese part of the Gulf of Guinea	36	Dec	1	34567	0	0	0	0	0
410	Bassas da India part of the Mozambique Channel	33	Dec	4	137707	0	0	0	0	0
411	Amsterdam Island & St. Paul Island part of the Indian Ocean	6	Dec	1	146997	0	0	0	0	0
